1 ARTICLE

2 **Climate change negatively impacts dominant**  
3 **microbes in the sediments of a High Arctic lake**

4 **Graham A. Colby<sup>1</sup>, Matti O. Ruuskanen<sup>1</sup>, Kyra A. St. Pierre<sup>2</sup>, Vincent**  
5 **L. St. Louis<sup>2</sup>, Alexandre J. Poulain<sup>1</sup>, Stéphane Aris-Brosou<sup>1,3</sup>**

6 <sup>1</sup>Department of Biology, University of Ottawa, Ottawa, ON K1N 6N5, Canada

7 <sup>2</sup>University of Alberta, Department of Biological Sciences, Edmonton, AB T6G 2E9,  
8 Canada

9 <sup>3</sup>Department of Mathematics and Statistics, University of Ottawa, Ottawa, ON K1N  
10 6N5, Canada

11 ✉: Stéphane Aris-Brosou ([sarisbro@uottawa.ca](mailto:sarisbro@uottawa.ca)).

12 *Running head:* Climate change impacts on High Arctic microbes

## 13 **Abstract**

14 Temperatures in the Arctic are expected to increase dramatically over the next century,  
15 yet little is known about how microbial communities and their underlying metabolic pro-  
16 cesses will be affected by these environmental changes in freshwater sedimentary systems.  
17 To address this knowledge gap, we analyzed sediments from Lake Hazen, NU Canada.  
18 Here, we exploit the spatial heterogeneity created by varying runoff regimes across the  
19 watershed of this uniquely large lake at these latitudes to test how a transition from low  
20 to high runoff, used as one proxy for climate change, affects the community structure and  
21 functional potential of dominant microbes. Based on metagenomic analyses of lake sedi-  
22 ments along these spatial gradients, we show that increasing runoff leads to a decrease in  
23 taxonomic and functional diversity of sediment microbes. Our findings are likely to apply  
24 to other, smaller, glacierized watersheds typical of polar or high latitude / high altitudes  
25 ecosystems; we can predict that such changes will have far reaching consequences on these  
26 ecosystems by affecting nutrient biogeochemical cycling, the direction and magnitude of  
27 which are yet to be determined.

28 **Keywords: High Arctic, microbial ecology, metagenome assembled genomes**  
29 **(MAGs), high-throughput sequencing**

## 30 Main

31 Climate change is amplified in polar regions, where near-surface temperatures have in-  
32 creased almost twice as fast as elsewhere on Earth over the last decade [1, 2, 3]. Climate  
33 models predict that temperature will increase in the Arctic by as much as 8°C by 2100  
34 [4]. These changes are already having dramatic consequences on physical [5, 6, 7], bio-  
35 geochemical [8, 9], and ecological [10, 11] processes across Arctic ecosystems. Yet, while  
36 we are starting to understand the effect of thawing permafrost on microbial communities  
37 [12, 13, 14], we know very little about how microbes in lentic ecosystems such as lakes  
38 respond to environmental changes – even though microbes mediate most global biogeo-  
39 chemical cycles [15, 16]. Furthermore, lakes are broadly considered sentinels of climate  
40 change, as they integrate physical, chemical and biological changes happening through  
41 their watersheds [17]; however, their microbial community structure and function are  
42 relatively understudied, in particular in the Arctic.

43 To date, much of the research performed on microbial communities in Arctic lakes  
44 has been limited to studies that were mostly based on partial 16S rRNA gene sequencing  
45 [18, 19, 20, 21, 22]. While these studies are useful to understand the structure of these  
46 microbial communities, they provide limited functional insights and can be biased as they  
47 often rely on sequence databases where environmental microbes, specifically from the  
48 Arctic, may be underrepresented [23, 24]. More critically, being circumscribed both in  
49 space and in time, previous studies only offer snapshots of microbial communities and  
50 hence, have a limited power to predict how microbial communities might respond to  
51 climate change.

52 To predict the effect of climate change on microbial functional diversity in Arctic lake  
53 sediments, we focused on Lake Hazen, the world’s largest High Arctic lake by volume

54 (82°N) [25]. In this work, we exploited two important properties of Lake Hazen. First, its  
55 watershed is already experiencing the effects of climate change, as increasing temperatures  
56 there are leading to more glacial melt, permafrost thaw, and increased runoff from the  
57 watershed into the lake in warmer years relative to cooler ones citelehnerr2018world.  
58 Second, its tributaries are highly heterogeneous, fed by eleven glaciers ranging from 6 to  
59 1041 km<sup>2</sup> in surface area, and annual runoff volume approximately scaling with their size  
60 (from <0.001 to 0.080 km<sup>3</sup> in 2016) [32].

61 It is this temporal and spatial heterogeneity in runoff that we used to evaluate the  
62 possible consequences of climate change on High Arctic sediment microbial functional  
63 diversity, acknowledging that the consequences of increasing temperature are likely slightly  
64 more plural and complex. To this effect, we sampled lake sediments along two transects  
65 representing low (L transect: samples L1 [shallow] and L2 [deep]) and high (H: samples H1  
66 [shallow] and H2, [deep]) seasonal runoff volume, as well as at a single site that received  
67 negligible runoff (C site; Figure 1A). We also collected soil samples (S sites) from three  
68 sites in the dried streambeds of the tributaries, on the northern shore between the two  
69 transects to assess soil influence on microbial communities present in the sediments. We  
70 then resorted to untargeted metagenomics analyses to draw an inventory of dominant  
71 microbes, assumed to be the most critical to nutrient cycling and the most relevant to  
72 the dynamics of microbial communities. These reconstructed Metagenome Assembled  
73 Genomes (MAGs) [26] allowed us to assess the quantitative impact of a change of runoff  
74 regime, from low to high, on both the structure of sediment microbial communities and  
75 their functional potential. We show that an increase in runoff volume and resultant  
76 sedimentation rates, as predicted under climate change scenarios for the region, could  
77 lead to a reduced diversity of the dominant microbial community and of their functional  
78 potential.

## 79 **Characterization of the physical and geochemical environments**

80 We first characterized how geochemical properties of the sediments varied along and  
81 between the two transects. Sediment samples from these five sites clustered into four  
82 distinct geochemical groups (Figure 1B) that reflect spatial variability in glacial runoff,  
83 the primary hydrological input to the lake. Indeed, PC1 explained 43% of the total  
84 variance ( $\sigma^2$ ), and differentiated the L and high H runoff transects, while PC2 (29.9%)  
85 separated each transect according to their depth.

86 Along PC1, higher concentrations of ammonia ( $\text{NH}_3$ ) and sulfate ( $\text{SO}_4^{2-}$ ) in the pore-  
87 waters, and a greater percentage of calcium carbonate in the sediments, were present  
88 in the H transect. However, higher concentrations of dioxygen ( $\text{O}_2$ ), nitrates / nitrites  
89 ( $\text{NO}_3^-/\text{NO}_2^-$ ), and greater redox potential were present in the L transect and the control  
90 (C) sites. Along PC2, sediment organic carbon (OC), and porewater pH and  $\text{Cl}^-$ , were  
91 more determinant when discriminating between the shallow (L1 and H1) and deep (L2  
92 and H2) sites of both transects (Supplementary Figures 4-5). Rather than grouping spa-  
93 tially with the H transect, the C sites were most chemically similar to L1 (Figure 1C,  
94 Supplementary Figure 6). The shallow sites were not significantly different from each  
95 other in pH or OC concentrations, but were both significantly different from the deeper  
96 sites suggesting that although most chemical features were similar within each transect,  
97 some features might still be influenced by their spatial proximity to the shoreline or depth  
98 of the overlying water column (Figure 1C).

99 **Contrasting low *vs.* high runoff transects revealed a decrease in**  
100 **biodiversity**

101 With such a clear geochemical separation of the transects along PC1 (43% of  $\sigma^2$ ) and  
102 significant spatial contrasts (Figure 1C), we had the right context to evaluate the influ-  
103 ence of runoff gradients on sediment microbial diversity. We assembled a total of 300  
104 (290 bacterial and 10 archaeal) MAGs that were >50% complete and with <10% con-  
105 tamination (Supplementary Tables 6-7). By constructing phylogenetic trees for Bacteria  
106 and Archaea, we noted that while most major phyla were represented in the MAGs, no  
107 Firmicutes and only a small number of Archaea were identified (Figure 2). In contrast,  
108 Gammaproteobacteria ( $n = 50$ ), Actinobacteria ( $n = 31$ ), Alphaproteobacteria ( $n = 24$ ),  
109 Chloroflexoata ( $n = 30$ ), Planctomycetota ( $n = 24$ ), and Acidobacteriota ( $n = 19$ )  
110 were the most commonly recovered taxa across the entire watershed. Uncultured phyla  
111 comprised ~11% of reconstructed MAGs, including representatives from multiple taxa:  
112 Eisenbacteria ( $n = 12$ ), Patescibacteria ( $n = 9$ ), Omnitrophica ( $n = 5$ ), KSB1 ( $n = 1$ ),  
113 Armatimonadota ( $n = 1$ ), Lindowbacteria ( $n = 1$ ), USBP1 ( $n = 1$ ), UBP10 ( $n = 1$ ), and  
114 Zixibacteria ( $n = 1$ ).

115 However, these MAGs were not evenly distributed across all sites (Figure 2, inset;  
116 Supplementary Figure 7). To quantify this uneven distribution, we determined the site  
117 where each genome was most abundant. Based solely on this information, we performed an  
118 unsupervised clustering (*t*-SNE), and found that the directions defined by sediment-laden  
119 water flowing from the shallow to the deep site within each transect in the projection space  
120 were almost orthogonal between transects (see arrows in Figure 3). This orthogonality  
121 suggests that transitioning from the L to the H transect could lead to a dramatic shift in  
122 microbial communities.

123 To assess the significance of these shifts at the phylum level, we calculated the relative  
124 proportions of each of the reconstructed 300 MAGs at each site, and tallied these numbers  
125 by phylum, over the 43 phyla represented in our data. We did this along each transect –  
126 essentially pooling sites H1/H2 together to represent the H transect, and doing the same  
127 for sites L1/L2 (the L transect), while keeping proportions for the S and C sites separate.  
128 Hierarchical clustering on this table of MAGs proportions by phyla *vs.* sites showed a  
129 divergence from the L to H transects (following the (((L,C),H),S) clustering pattern;  
130 Figure 4A, inset), confirming the clear contrast between the two transects in terms of  
131 taxa proportions (see Figure 3). To test if these taxa proportions tended to increase or  
132 decrease when transitioning from L to H along the (((L,C),H),S) clustering pattern, we  
133 fitted linear models (ANOVA) regressing the proportions of each of the 43 phyla against  
134 sites, ordered as per their hierarchical clustering (L→C→H→S). Essentially, we regressed  
135 a single data point for each of the four classes (L, C, H, and S), so that *P*-values could not  
136 be obtained, but slope could be estimated (Figure 4A). Strikingly, most of these slopes  
137 were negative (binomial test:  $P = 7.8 \times 10^{-8}$ ), demonstrating a significant decrease in  
138 diversity at the phylum level as one goes from low to high runoff regimes.

139 An NMDS ordination allowed us to detect the geochemical features associated with  
140 this shift in microbial communities (Supplementary Figure 8). In the sediments, NH<sub>3</sub>  
141 concentrations ( $P = 0.03$ ), NO<sub>2</sub><sup>-</sup> / NO<sub>3</sub><sup>-</sup> concentrations ( $P = 0.03$ ), and redox potential  
142 ( $P = 0.03$ ) were significant in determining the distribution of MAGs (permutation test:  
143  $P < 0.05$ ). We further observed that the sites with the greatest diversity (L/C sites) were  
144 also those with the greatest redox potential, and O<sub>2</sub> and NO<sub>3</sub><sup>-</sup>/NO<sub>2</sub><sup>-</sup> concentrations. Sites  
145 with the lowest microbial diversity (H sites), contained greater NH<sub>3</sub> and SO<sub>4</sub><sup>2-</sup> concentra-  
146 tions, and lower redox potential. In addition to gradients shaped by the interplay between  
147 microbial metabolism and local geochemical constraints, the physical disturbances asso-

148 ciated with high sedimentation rates also likely contributed to the homogenization of the  
149 microbial community structure; however, we cannot quantify the relative importance of  
150 each of these processes here.

## 151 **Contrasting low *vs.* high runoff transects also revealed a loss of** 152 **functional potential**

153 To assess the functional implications of this decrease of biodiversity, we assigned metabolic  
154 functions and pathways to proteins in each MAG. We focused on genes and pathways in-  
155 volved in key elements, targeting carbon, nitrogen, and sulfur cycling (Supplementary  
156 Figures 9-10). Only the most abundant genomes per site were reported within each phy-  
157 lum (Supplementary Figure 11), allowing us to compute the proportions of functions and  
158 pathways in each of the 43 phyla present in reconstructed MAGs across the hydrological  
159 regimes. Their hierarchical clustering (Supplementary Figures 12-14) led to a picture con-  
160 sistent with the ones derived from both geochemical (Figure 1) and taxonomic abundances  
161 (Figure 4A). Indeed, the two transects were again clearly separated (clustering pattern  
162 (((L,C),S),H); Figure 4B, inset), and fitting linear models regressing function/pathway  
163 proportions against sites showed that, again, most of these slopes were negative (bino-  
164 mial test:  $P = 0.0010$ ). Forcing the same site ordering as for the taxonomic abundances  
165 (L→C→H→S as in Figure 4A, inset) led to similar results (binomial test:  $P = 7.8 \times 10^{-5}$ ),  
166 demonstrating a significant decrease in metabolic diversity when going from the L to the  
167 H transect.

168 More specifically, we found that marker genes whose product is implicated in carbon  
169 and sulfur metabolisms significantly decreased when going from the L to H, while nitrogen  
170 metabolism was unaffected (Supplementary Table 8; see Supplementary Text for details).



171 When considering the individual functions present or absent across the transects, we noted  
172 that most oxidative pathways (CO, methane, formaldehyde, sulfide, sulfite) appeared less  
173 common in the H transect (Supplementary Figure 9), corresponding to lower oxygen  
174 concentrations and constraints on aerobic metabolism. Furthermore, while most carbon  
175 fixation processes were shared between the two transects, carbon oxidation and reduction  
176 reactions regulated through Wood-Ljungdahl pathway were only observed in the H tran-  
177 sect, where sedimentary conditions were anoxic throughout the first 5cm (Supplementary  
178 Figures 4-5), consistent with a more reductive environment.

## 179 Discussion

180 Even if Arctic microbial communities are changing rapidly [13], there is still a dearth of  
181 long-term time series observations. To address this point, we used Lake Hazens spatial  
182 geochemical heterogeneity to evaluate the structural and functional response of lake sedi-  
183 ment microbial communities to varying runoff, already shown to increase in this warming  
184 High Arctic environment [9]. Such an approach can reasonably be interpreted from the  
185 lens of a space-for-time design, which assumes that spatial and temporal variations are  
186 not only equivalent [27, 28], but also stationary [29]. Whether this latter condition is met  
187 cannot be known, but in the absence of any time-series documenting the effect of climate  
188 change on lake sediment microbial communities in the High Arctic, the space-for-time  
189 design becomes a convenience, if not a necessity [30].

190 Using metagenomics along two transects experiencing heterogeneous runoff conditions,  
191 we presented evidence that climate change, as it drives increasing runoff and sediment  
192 loading to glacial lakes, will likely lead to a decrease in both diversity and functional  
193 potential of the dominant microbial communities residing in lake sediments. Note that

194 we specifically focused here on the dominant microbes, that is those for which we could  
195 reconstruct the MAGs, in order to (i) have a phylogenetic placement of the corresponding  
196 organisms based on a large number of marker genes (Figure 2), rather than partial 16S  
197 rRNA gene sequences as usually done [23], and (ii) be able to predict almost complete  
198 functional pathways for each of these organisms to test the impact of a change of runoff  
199 (Figure 4), rather than inferring function from taxonomic affiliation [23].

200 Such a decrease in taxonomic and functional diversity may not be unique to Lake  
201 Hazen, where rising temperatures have resulted in increasing glacial melt and associated  
202 runoff. Although such a pattern was not observed in other regions of the globe where  
203 runoff is predicted to decrease [31, 32], our findings are likely to apply to other, smaller,  
204 glacierized watersheds typical of high latitudes or altitudes. Indeed, at least in the Arctic,  
205 freshwater discharge is broadly expected to increase with increasing temperatures and  
206 precipitation loadings [33, 34, 35]. It would thus be immensely valuable to conduct sim-  
207 ilar studies, replicating where appropriate a similar space-for-time design, at other lakes  
208 throughout the world. Additional sampling efforts should carefully consider the spatial  
209 heterogeneity of runoff regimes leading to divergent sedimentation rates (Supplementary  
210 Table 2), limiting our ability to make temporal predictions.

211 Despite lacking geochemical measurements for the soil samples, we found that the  
212 microbial communities in the sediments at the high runoff sites clustered most frequently  
213 with those in the soil sites (Figure 4), highlighting a connection between terrestrial and  
214 aquatic sediment communities as a function of the runoff volume, consistent with previous  
215 findings [36, 37]. Unsurprisingly, as the soil is likely a source of nutrients (*e.g.*, DOC)  
216 and organic and inorganic particles, we would expect increased runoff to the aquatic  
217 ecosystems to alter microbial community structure [38]. Some of these structural changes  
218 may then alter the functional capacity to metabolize carbon, nitrogen, sulfur compounds

219 and process toxins such as metals and antibiotics (Supplementary Figure 9). A more  
220 experimentally-driven approach, based for instance on *in situ* incubation and geochemi-  
221 cal tracers, would have been necessary to quantify such an interplay between microbial  
222 metabolism and geochemical features. Yet, as sediments and nutrients are mostly de-  
223 posited during the summer melt months, it can be expected that lake sediments record  
224 microbe-driven seasonal changes in their geochemistry. Indeed, high glacial runoff is  
225 known to bring dense, oxygenated river waters with OC directly to the bottom of the lake  
226 [32], stimulating aerobic microbial activity. As a result, the geochemistry recorded along  
227 the high runoff transect may first reflect a period of greater microbial metabolism, which  
228 may actually exceed those in temperate systems [39], eventually followed by low oxygen,  
229 low redox, and high NH<sub>3</sub> conditions observed here (Figure 1) as oxygen is depleted and  
230 anaerobic metabolisms allowed to proceed.

231 At a larger temporal scale, a key question that arises from these results is how changes  
232 in hydrological regimes will alter the evolutionary dynamics of microbial communities in  
233 lake sediments. Niche differentiation, where the coexistence of ecological opportunities  
234 can facilitate species diversification, may explain why sediments along the low runoff  
235 transect hosts a more diverse microbial community than sediments along the high runoff  
236 transect [40]. Presently, climate change is predicted to increase runoff in this High Arctic  
237 environment [9], and we found evidence suggesting that the increased runoff homogenizes  
238 community structure. This can be expected to disrupt niche differentiation, and hence to  
239 reduce the overall and long-term metabolic capacity in lake sediments. It is currently hard  
240 to predict the future microbial ecology of these systems. On the one hand, climate change  
241 may diminish species diversification, and lead to highly specialized microbial communities  
242 adapted to a homogeneous ecological niche characterized by low oxygen, low redox, and  
243 high NH<sub>3</sub> concentrations. On the other hand, the seasonal and rapid changes in redox

244 conditions, predicted to follow the strong but punctual input of oxygen and nutrients  
245 during springtime may allow for the development of a short-lived community that eluded  
246 our sampling and analysis.

247 The rapid changes that affect Lake Hazen's watershed in response to climate warming  
248 were already known to directly alter its hydrological regime. Here we further provide  
249 evidence that a combination of increasing runoff and changing geochemical conditions  
250 are associated with the reduced diversity and metabolic potential of its dominant micro-  
251 bial communities. While longitudinal studies are needed to confirm these patterns, it is  
252 still unclear how such losses in biodiversity and metabolic potential in Arctic ecosystems  
253 will impact key biogeochemical cycles, potentially creating feedback loops of uncertain  
254 direction and magnitude.

## 255 References

- 256 1. Overpeck, J. *et al.* Arctic environmental change of the last four centuries. *Science*  
257 **278**, 1251–1256 (1997).
- 258 2. Serreze, M. C. & Francis, J. A. The Arctic amplification debate. *Climatic change*  
259 **76**, 241–264 (2006).
- 260 3. Screen, J. A. & Simmonds, I. The central role of diminishing sea ice in recent Arctic  
261 temperature amplification. *Nature* **464**, 1334 (2010).
- 262 4. IPCC. *Summary for Policymakers*, book section SPM, 1–30 (Cambridge University  
263 Press, Cambridge, United Kingdom and New York, NY, USA, 2013). Available at  
264 [www.climatechange2013.org](http://www.climatechange2013.org).

- 265 5. Laudon, H. *et al.* Save northern high-latitude catchments. *Nature Geoscience* **10**,  
266 324 (2017).
- 267 6. Bliss, A., Hock, R. & Radić, V. Global response of glacier runoff to twenty-first  
268 century climate change. *Journal of Geophysical Research: Earth Surface* **119**, 717–  
269 730 (2014).
- 270 7. O'Reilly, C. M. *et al.* Rapid and highly variable warming of lake surface waters  
271 around the globe. *Geophysical Research Letters* **42**, 10–773 (2015).
- 272 8. Frey, K. E. & McClelland, J. W. Impacts of permafrost degradation on Arctic river  
273 biogeochemistry. *Hydrological Processes: An International Journal* **23**, 169–182  
274 (2009).
- 275 9. Lehnherr, I. *et al.* The world's largest High Arctic lake responds rapidly to climate  
276 warming. *Nature Communications* **9**, 1290 (2018).
- 277 10. Smol, J. P. *et al.* Climate-driven regime shifts in the biological communities of  
278 Arctic lakes. *Proceedings of the National Academy of Sciences* **102**, 4397–4402  
279 (2005).
- 280 11. Wrona, F. J. *et al.* Transitions in Arctic ecosystems: Ecological implications of  
281 a changing hydrological regime. *Journal of Geophysical Research: Biogeosciences*  
282 **121**, 650–674 (2016).
- 283 12. McCalley, C. K. *et al.* Methane dynamics regulated by microbial community re-  
284 sponse to permafrost thaw. *Nature* **514**, 478 (2014).
- 285 13. Hultman, J. *et al.* Multi-omics of permafrost, active layer and thermokarst bog soil  
286 microbiomes. *Nature* **521**, 208 (2015).

- 287 14. Mackelprang, R., Saleska, S. R., Jacobsen, C. S., Jansson, J. K. & Taş, N. Per-  
288 mafrost meta-omics and climate change. *Annual Review of Earth and Planetary*  
289 *Sciences* **44**, 439–462 (2016).
- 290 15. Falkowski, P. G., Fenchel, T. & Delong, E. F. The microbial engines that drive  
291 Earth's biogeochemical cycles. *Science* **320**, 1034–1039 (2008).
- 292 16. Fuhrman, J. A. Microbial community structure and its functional implications.  
293 *Nature* **459**, 193 (2009).
- 294 17. Williamson, C. E., Saros, J. E., Vincent, W. F. & Smol, J. P. Lakes and reser-  
295 voirs as sentinels, integrators, and regulators of climate change. *Limnology and*  
296 *Oceanography* **54**, 2273–2282 (2009).
- 297 18. Stoeva, M. K. *et al.* Microbial community structure in lake and wetland sediments  
298 from a High Arctic polar desert revealed by targeted transcriptomics. *PLoS One*  
299 **9**, e89531 (2014).
- 300 19. Thaler, M., Vincent, W. F., Lionard, M., Hamilton, A. K. & Lovejoy, C. Microbial  
301 community structure and interannual change in the last epishelf lake ecosystem in  
302 the north polar region. *Frontiers in Marine Science* **3**, 275 (2017).
- 303 20. Mohit, V., Culley, A., Lovejoy, C., Bouchard, F. & Vincent, W. F. Hidden biofilms  
304 in a far northern lake and implications for the changing Arctic. *npj Biofilms and*  
305 *Microbiomes* **3**, 17 (2017).
- 306 21. Ruuskanen, M. O., St. Pierre, K. A., St. Louis, V. L., Aris-Brosou, S. & Poulain,  
307 A. J. Physicochemical drivers of microbial community structure in sediments of  
308 Lake Hazen, Nunavut, Canada. *Frontiers in Microbiology* **9**, 1138 (2018).

- 309 22. Cavaco, M. A. *et al.* Freshwater microbial community diversity in a rapidly changing  
310 high arctic watershed. *FEMS Microbiol Ecol* **95** (2019).
- 311 23. Ruuskanen, M. O., St Pierre, K. A., St Louis, V. L., Aris-Brosou, S. & Poulain,  
312 A. J. Physicochemical drivers of microbial community structure in sediments of  
313 lake hazen, nunavut, canada. *Front Microbiol* **9**, 1138 (2018).
- 314 24. Ruuskanen, M. O. *et al.* Microbial genomes retrieved from high arctic lake sedi-  
315 ments encode for adaptation to cold and oligotrophic environments. *Limnology and*  
316 *Oceanography* (2019).
- 317 25. Köck, G. *et al.* Bathymetry and sediment geochemistry of Lake Hazen (Quttinir-  
318 paaq National Park, Ellesmere Island, Nunavut). *Arctic* 56–66 (2012).
- 319 26. Bowers, R. M. *et al.* Minimum information about a single amplified genome  
320 (MISAG) and a metagenome-assembled genome (MIMAG) of bacteria and archaea.  
321 *Nature biotechnology* **35**, 725 (2017).
- 322 27. Blois, J. L., Williams, J. W., Fitzpatrick, M. C., Jackson, S. T. & Ferrier, S.  
323 Space can substitute for time in predicting climate-change effects on biodiversity.  
324 *Proceedings of the National Academy of Sciences* **110**, 9374–9379 (2013).
- 325 28. Lester, R. E., Close, P. G., Barton, J. L., Pope, A. J. & Brown, S. C. Predicting  
326 the likely response of data-poor ecosystems to climate change using space-for-time  
327 substitution across domains. *Global change biology* **20**, 3471–3481 (2014).
- 328 29. Damgaard, C. A critique of the space-for-time substitution practice in community  
329 ecology. *Trends Ecol Evol* **34**, 416–421 (2019).

- 330 30. Pickett, S. T. Space-for-time substitution as an alternative to long-term studies.  
331 In *Long-term studies in ecology*, 110–135 (Springer, 1989).
- 332 31. Huss, M. & Hock, R. Global-scale hydrological response to future glacier mass loss.  
333 *Nature Climate Change* **8**, 135 (2018).
- 334 32. Pierre, K. S. *et al.* Contemporary limnology of the rapidly changing glacierized  
335 watershed of the world’s largest high arctic lake. *Scientific reports* **9**, 4447 (2019).
- 336 33. Peterson, B. J. *et al.* Increasing river discharge to the arctic ocean. *science* **298**,  
337 2171–2173 (2002).
- 338 34. Rawlins, M. A. *et al.* Analysis of the arctic system for freshwater cycle intensifi-  
339 cation: Observations and expectations. *Journal of Climate* **23**, 5715–5737 (2010).  
340 Available at <http://dx.doi.org/10.1175/2010JCLI3421.1>.
- 341 35. Bring, A. *et al.* Arctic terrestrial hydrology: A synthesis of processes, regional  
342 effects, and research challenges. *Journal of Geophysical Research: Biogeosciences*  
343 **121**, 621–649 (2016).
- 344 36. Comte, J., Culley, A. I., Lovejoy, C. & Vincent, W. F. Microbial connectivity and  
345 sorting in a High Arctic watershed. *The ISME journal* **12**, 2988–3000 (2018).
- 346 37. Ruiz-González, C., Niño-García, J. P. & del Giorgio, P. A. Terrestrial origin of  
347 bacterial communities in complex boreal freshwater networks. *Ecology letters* **18**,  
348 1198–1206 (2015).
- 349 38. Le, H. T. *et al.* Responses of aquatic bacteria to terrestrial runoff: effects on  
350 community structure and key taxonomic groups. *Frontiers in microbiology* **7**, 889  
351 (2016).



- 352 39. Probst, A. J. *et al.* Differential depth distribution of microbial function and puta-  
353 tive symbionts through sediment-hosted aquifers in the deep terrestrial subsurface.  
354 *Nature microbiology* **3**, 328 (2018).
- 355 40. Cordero, O. X. & Polz, M. F. Explaining microbial genomic diversity in light of  
356 evolutionary ecology. *Nature Reviews Microbiology* **12**, 263 (2014).

## 357 **Acknowledgements**

358 This study was made possible through a collaborative effort undertaken by Igor Lehn-  
359 herr, Stephanie Varty, Victoria Wisniewski (University of Toronto, Mississauga), Charles  
360 Talbot (Environment and Climate Change Canada), and Maria Cavaco (University of  
361 Alberta). We thank Linda Bonen, Marina Cvetkovska, Manon Ragonnet and Alex Wong  
362 for comments and discussions. Funding support was provided by the Natural Science and  
363 Engineering Research Council of Canada (VSL, AJP, SAB), ArcticNet Network Centre  
364 of Excellence (VSL, AJP), and the Polar Continental Shelf Program (VSL) in Resolute,  
365 Nunavut, which provided logistical and financial support.

## 366 **Contributions**

367 G.C. and V.S.L. performed sampling, whereas G.C. conducted laboratory analyses. G.C.  
368 and S.A.B. performed data analyses. G.C., S.A.B., V.S.L., and A.J.P. designed the study  
369 and wrote the manuscript. V.S.L. conducted the microsensor profiles and porewater  
370 extractions. G.C., S.A.B., A.J.P., M.R., K.S.P., and V.S.L. reviewed the manuscript.

## 371 **Ethics declarations / Competing interests**

372 The authors declare no competing interests.

373 **Supplementary information**

374 Supplementary information is available for this paper.

375 **Figure captions**

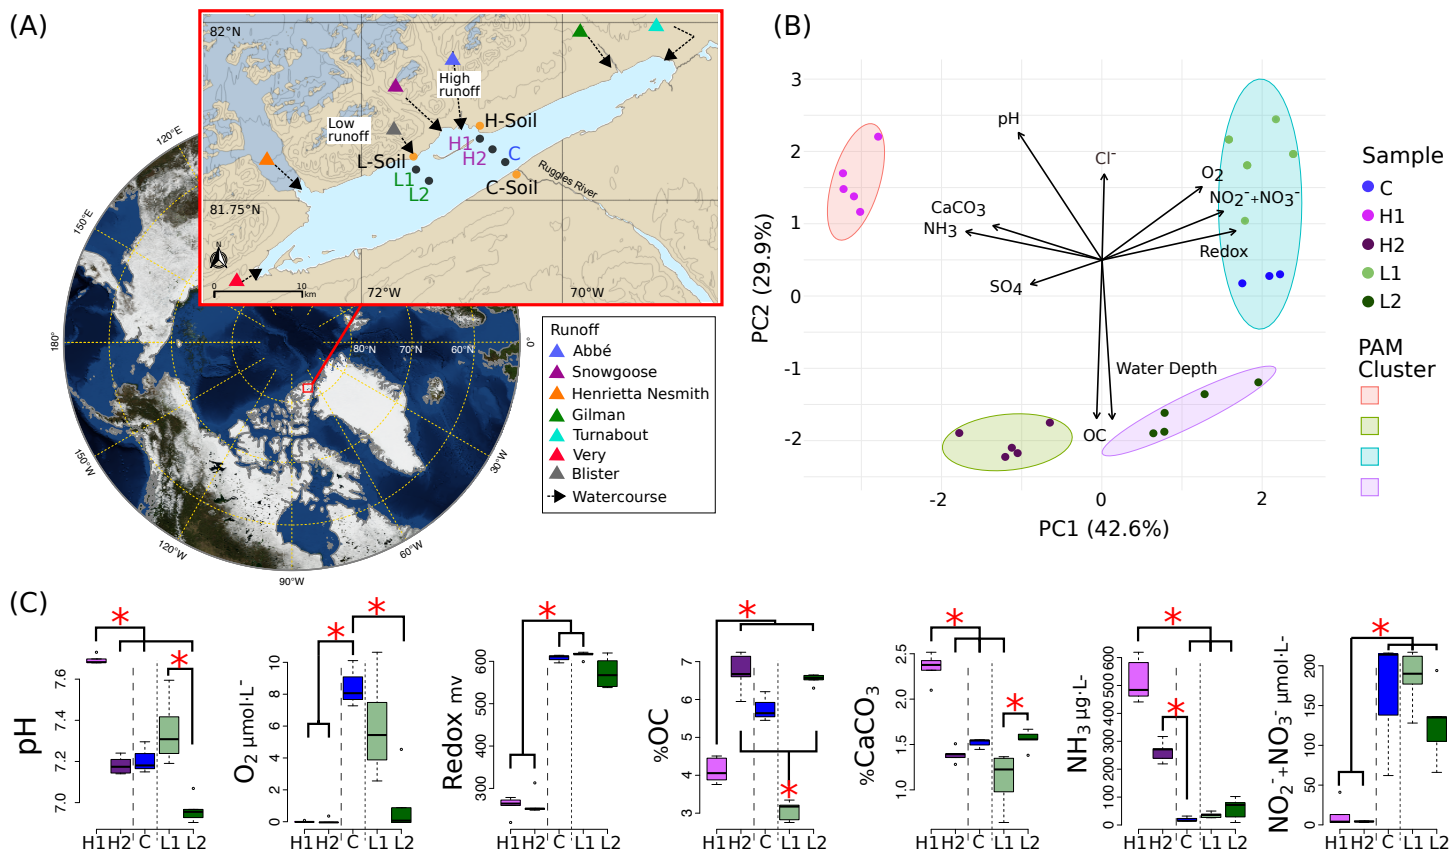

**Figure 1.** Lake Hazen sampling design and chemical composition. (A) Location of Lake Hazen (red box). Inset map: soil (orange dots) and sediment (black dots) sample sites are separated into hydrological regimes of high (purple), low (green), and negligible/control (blue) runoff. (B) Principal component analysis (PCA) showing the differences in physical and chemical composition of the sediment sites. Vectors display pH, dissolved dioxygen ( $O_2$ ), redox potential, nitrates and nitrites concentration ( $NO_2^- + NO_3^-$ ), water depth, percent organic carbon (OC), percent calcium carbonate ( $CaCO_3$ ), sulfate ( $SO_4^{2-}$ ) concentration ( $SO_4$ ), and ammonia concentration ( $NH_3$ ). Individual points represent the mean values using 1 cm intervals measured in the top 5 cm. Partitioning around medoids was used to identify clusters. (C) Distribution of chemical features for sediment sites. Branches and asterisks indicate significant differences between sites  $P < 0.025$  (Dunn Test). If branch tips form a dichotomy or trichotomy, the interactions within that group is not significant. Long dashes separate high runoff sites and dotted line separates low runoff sites. There was insufficient data to include soil sites in B and C.

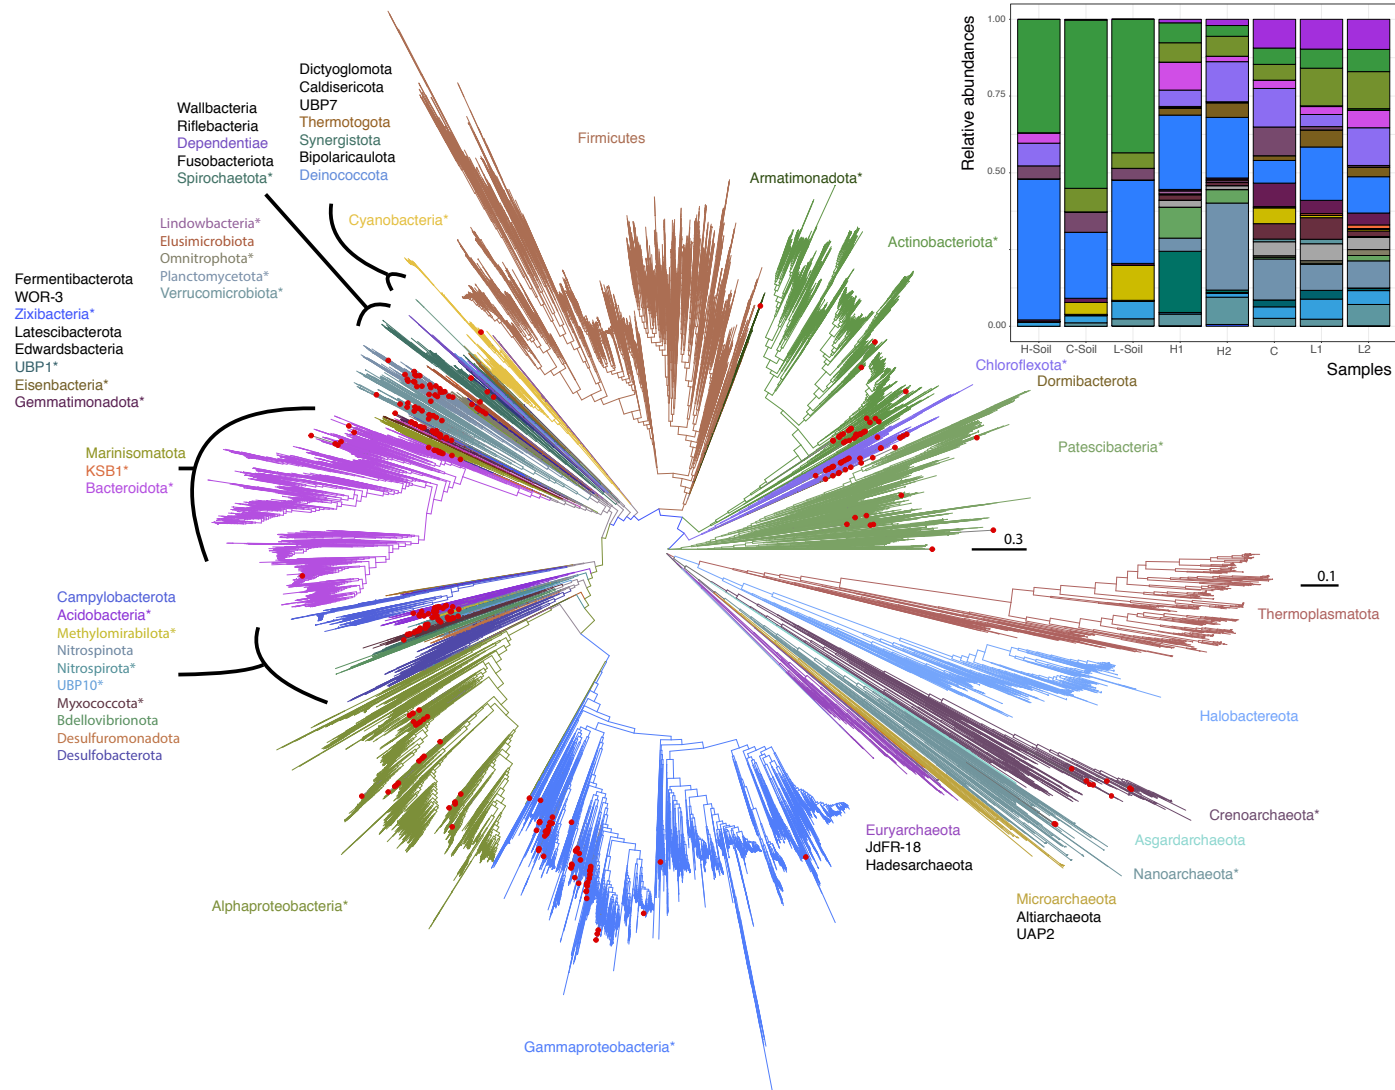

**Figure 2.** Maximum likelihood phylogenetic trees of Lake Hazen genomes based on 120 concatenated bacteria and 122 concatenated archaea protein-coding genes. Red Dots: Lake Hazen genomes. Asterisks (\*) indicate phyla that contain Lake Hazen genomes. Bacteria tree is rooted with Patescibacteria and Archaea tree is rooted with Euryarchaeota. See GitHub account for full taxonomy tree files and for original tree files (Supplemental Data File 2 and 3). Inset shows MAG abundance across sites, in the 300 high quality genomes for each sample normalized to 100%.

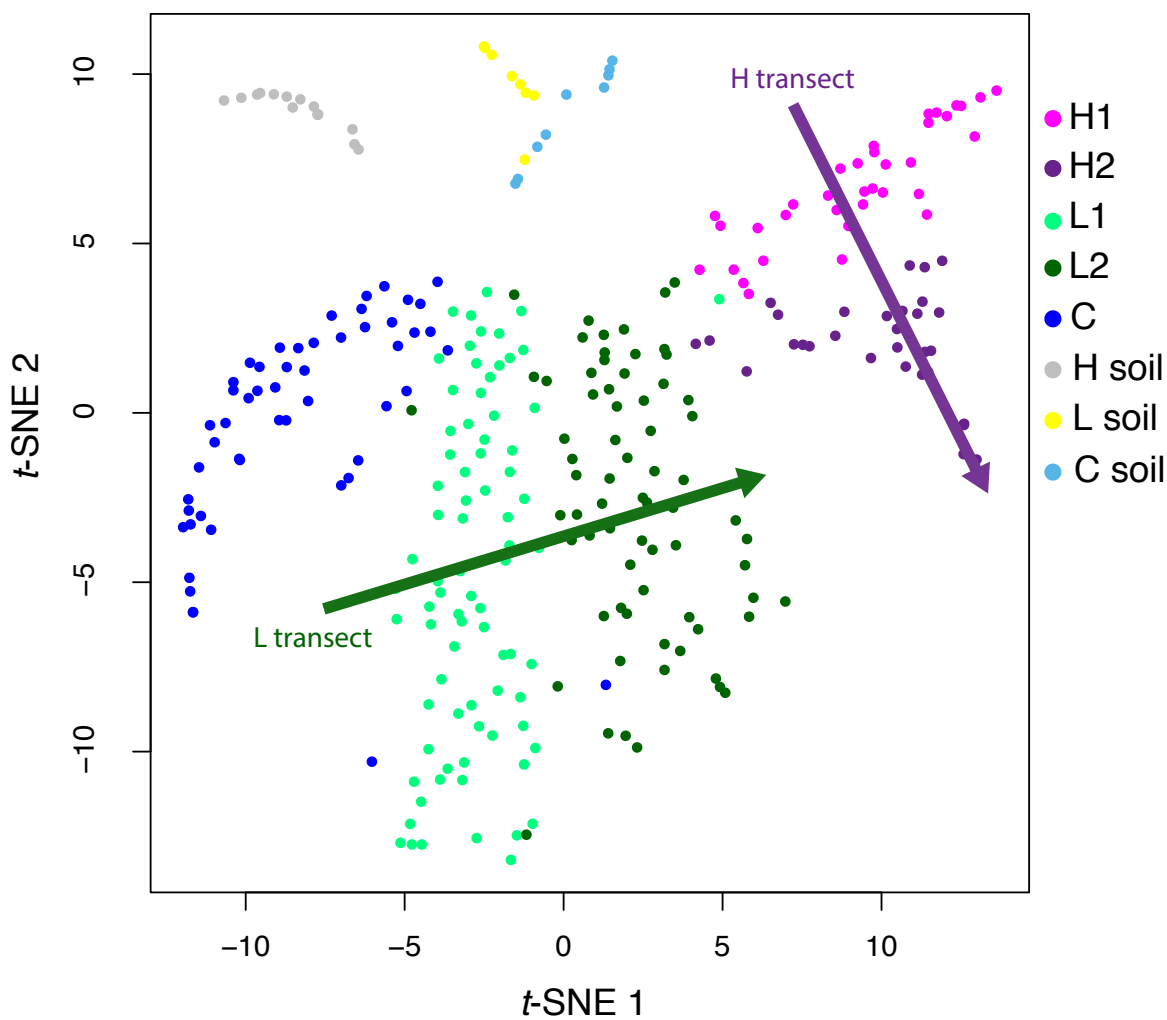

**Figure 3.** *t*-SNE analysis of genome abundance for each sediment sample. Each of the 300 shown genomes was assigned to the sample where it has the greatest abundance. Shaded arrows display the approximate direction of water flow, from upstream to downstream, for the high (green) and low (purple) transects.

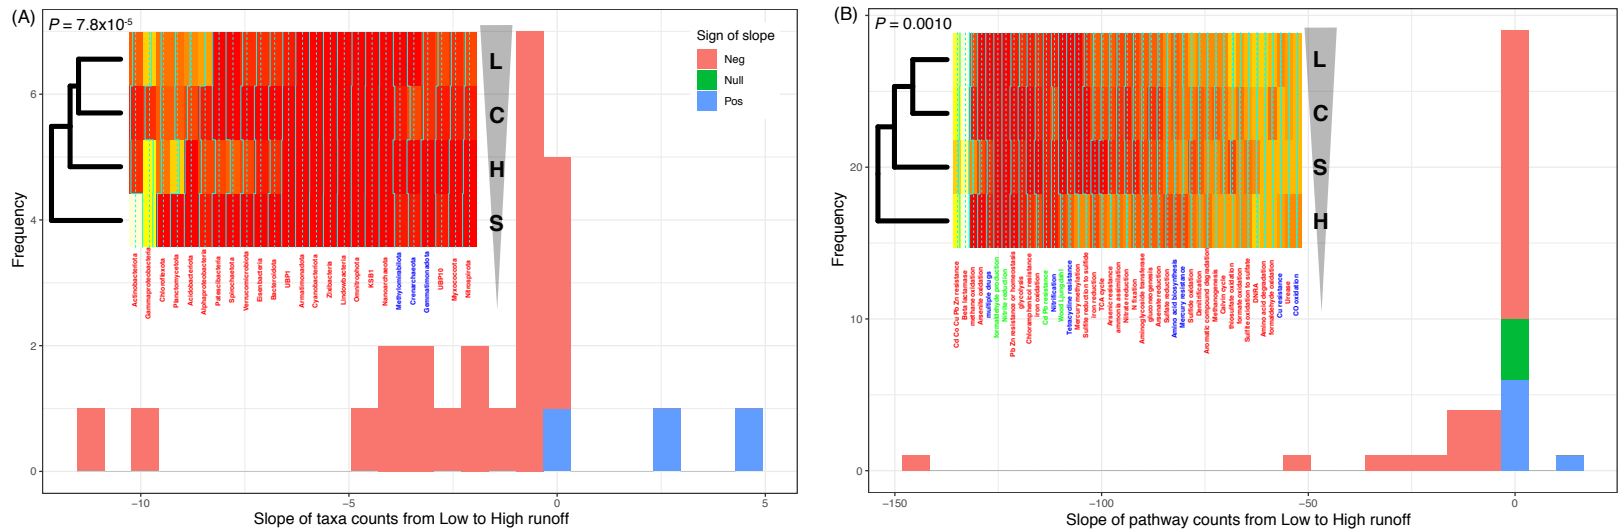

**Figure 4.** Transition from low to high runoff leads to a decrease in diversity. (A) Distribution of the slopes of taxonomic counts as a function of sites. (B) Distribution of the slopes of pathway counts as a function of sites. In both cases, counts were aggregated by location types (L [Low], C [Control], S [Soil], and H [High] sites), and linear models (ANOVA) were fitted to estimate the slope of each regression. Insets: heatmap representations of count tables; leftmost dendrograms show how the location types cluster, transitioning from L to H runoffs (vertical triangle pointing down). *P*-values: one-sided binomial test for enrichment in negative slopes.

## 1 **Online methods**

### 2 **Sample collection and processing**

3 Sediment and soil cores were collected from Lake Hazen (82°N, 71°W: Figure 1A), located  
4 within Quttinirpaaq National Park, on northern Ellesmere Island, Nunavut. Sampling  
5 took place between May 10 and June 10, 2017, when the lake was still completely ice-  
6 covered (Supplementary Table 1). Within the watershed, runoff flows from the outlet  
7 glaciers along the northwestern shoreline through poorly consolidated river valleys, de-  
8 positing sediments at the bottom of Lake Hazen along two transects, the H1/H2 and  
9 L1/L2 sites, respectively. The lake then drains via the Ruggles River along its south-  
10 eastern shoreline (C sites). The surrounding glacial rivers deliver different amounts of  
11 sediments, nutrients and organic carbon unevenly to the lake as a consequence of hetero-  
12 geneous sedimentation rates (Supplementary Table 2). More specifically, the top 5 cm of  
13 sediments from the deeper low (L2) and high (H2) runoff sites represented depositional  
14 periods of 30 years (1987-2017) and 6 years (2011-2017), respectively (Supplementary  
15 Table 3).

16 Samples were collected along two transects and can be separated into three hydrologi-  
17 cal regimes by seasonal runoff volume: low (L transect), high (H transect), and negligible  
18 runoff (C sites) summarized in Supplementary Table 3. Contamination of samples was  
19 minimized by wearing non-powdered latex gloves during sample handling and sterilizing  
20 all equipment with 10% bleach and 90% ethanol before sample collection. Sediment cores  
21 approximately 30 cm in length were collected with an UWITEC (Mondsee, Austria) grav-  
22 ity corer from five locations: C (overlying water depth: 50 m) far from the direct influence  
23 of glacial inflows serving as a control site; L1 (water depth: 50 m) and L2 (water depth:  
24 251 m), at variable distances from a small glacial inflow (Blister Creek, <0.001 km<sup>3</sup> in



25 summer 2016); and, H1 (water depth: 21 m) and H2 (water depth: 253 m), located ad-  
26 jacent to several larger glacial inflows (*i.e.*, the Abbé River, 0.015 km<sup>3</sup> and Snow Goose,  
27 0.006 km<sup>3</sup> in 2016). The soil samples (S sites) were collected from three sites in the dried  
28 streambeds of the tributaries, on the northern shore between the two transects. At each  
29 site, for both sediments and soil, five cores were sampled, ~3 m apart for the sediment  
30 cores, and approximately ~1 m apart to account for site heterogeneity.

31 For sediment core, one of the five cores were used for microprofiling of oxygen (O<sub>2</sub>),  
32 redox and pH, as well as one core for porewater chemistry and loss on ignition (see [1] for  
33 details), and the remaining three cores were combined, prior to their genomic analysis, here  
34 again to account for site heterogeneity. For soil samples, three cores per site were collected  
35 for DNA analysis, but no additional cores were collected for chemical analyses. As we  
36 were mostly interested in the community composition through space, we combined the  
37 top 5 cm of sediment and 10 cm of soil for sample extraction and subsequent sequencing.  
38 Any remaining length of cores that were used for DNA analysis were discarded. These  
39 uppermost layers in the sediment correspond to both the most recent sediment deposition  
40 dates [2] and the region of greatest microbial activity [3]. The top of each core was  
41 sectioned and placed into Whirlpack bags. These slices were homogenized manually inside  
42 of the bags and stored in a -20°C freezer until shipment back to the University of Ottawa  
43 where they were then stored at -80°C. Soil samples were transferred into falcon tubes,  
44 homogenized, and stored as described above for the lake sediment samples.

45 Samples were thawed overnight and 250-400 mg (wet weight; Supplementary Table  
46 4) were then washed in a sterile salt buffer (10 mM EDTA, 50 mM Tris-HCl, 50 mM  
47 Na<sub>2</sub> HPO<sub>4</sub> 7H<sub>2</sub>O at pH 8.0) to remove PCR inhibitors [4, 5]. All sample handling was  
48 conducted in a stainless-steel laminar flow hood (HEPA 100) treated with UVC radiation  
49 and bleach before use. DNA extractions were performed using the DNeasy PowerSoil Kit

50 (MO BIO Laboratories Inc, Carlsbad, CA, USA), following the kit guidelines, except that  
51 the final elution volume was 30  $\mu\text{l}$  instead of 100  $\mu\text{l}$ . DNA integrity was validated with  
52 a NanoDrop Spectrometer and PCR combined with electrophoresis of the Glutamine  
53 synthetase gene (*glnA*) as this gene is ubiquitous across microbial life (Supplementary  
54 Figure 1 and Supplementary Table 5). Adequate DNA concentrations for sequencing were  
55 reached by combining triplicate extractions for a total volume of 45  $\mu\text{l}$  and a concentration  
56  $\geq 50 \text{ ng}/\mu\text{l}$  (Supplementary Table 4). Positive and negative controls were used to verify  
57 the integrity of the PCR amplification. Two kit extraction blanks contained no trace of  
58 DNA and were not sequenced.

## 59 **Chemical analyses**

60 Redox potential, pH, and dissolved  $\text{O}_2$  concentration profiles were measured at 100  $\mu\text{M}$   
61 intervals in the field within an hour of collection, using Unisense (Aarhus, Denmark) mi-  
62 crosensors connected to a Unisense Field Multimeter. Cores used for porewater chemistry  
63 analysis were sectioned in 1 cm intervals into 50 mL falcon tubes, followed by flushing  
64 of any headspace with ultra-high-purity nitrogen ( $\text{N}_2$ ) before capping. Sediment pore-  
65 water was extracted following centrifugation at 4,000 rpm. The supernatant was then  
66 filtered through 0.45  $\mu\text{m}$  cellulose acetate filters into 15 ml tubes, and were frozen until  
67 analysis. Concentrations of nitrates and nitrites ( $\text{NO}_2^- + \text{NO}_3^-$ ), and ammonia ( $\text{NH}_3$ ),  
68 chloride ( $\text{Cl}^-$ ) were measured in the sediment porewater using a Lachat QuickChem 8500  
69 FIA Ion Analyzer, while total dissolved phosphorus (TDP) and  $\text{SO}_4^{2-}$  were measured in  
70 the sediment porewater using an ion chromatograph at the Biogeochemical Analytical  
71 Service Laboratory (Department of Biological Sciences, University of Alberta). However,  
72 TDP was removed from data analysis because insufficient porewater was collected to mea-  
73 sure TDP at site C. The centrifuged sediments were retained and percentages of calcium

74 carbonate ( $\text{CaCO}_3$ ) and organic carbon (OC) were estimated through loss on ignition [6].

75 The chemical features of the top 5 cm of the sediment cores were derived from mea-  
76 surements performed at 1 cm intervals throughout the cores. The geochemical properties  
77 of each sediment site were summarized using a Principle Component Analysis (PCA)  
78 and projections were clustered using Partitioning Around Medoids [7]. The appropriate  
79 number of clusters was determined from silhouettes with the R package hopach [8]. The  
80 Dunn test [9] was used to compare samples, controlling for multiple comparisons with the  
81 Benjamini-Hochberg adjustment.

## 82 Sequencing and data processing

83 Metagenomic libraries were prepared and sequenced by Genome Quebec on an Illumina  
84 HiSeq 2500 platform (Illumina, San Diego, CA, USA; Supplementary Figure 2) on a  
85 paired-end 125 bp configuration using Illumina TruSeq LT adapters (read 1: AGATCG-  
86 GAAGAGCACACGTCTGAACTCCAGTCAC, and read 2: AGATCGGAAGAGCGTCGT-  
87 GTAGGGAAAGAGTGT). The DNA from the eight sites (five sediments, three soils) was  
88 sequenced, generating over 150 GB of data. Read count summaries were tracked through-  
89 out each step of the pipeline for quality control (Supplementary Figure 3). Low quality  
90 reads, adapters, unpaired reads, and low quality bases at the ends of reads were removed to  
91 generate quality controlled reads with Trimmomatic (v0.36) [10] using the following argu-  
92 ments: phred33, ILLUMINACLIP:TruSeq3-PE-2.fa:3:26:10, LEADING:3 TRAILING:3,  
93 SLIDINGWINDOW:4:20, MINLEN:36, CROP:120, HEADCROP:20, AVGQUAL:20. FASTQC  
94 (v0.11.8) [11] was then used to confirm that the Illumina adapters were removed and that  
95 trimmed sequence lengths were at least 90 bp in length with a Phred score of at least 33.

## 96 **Reconstruction of environmental genomes and annotation**

97 To reconstruct environmental genomes, metagenomic quality-controlled reads from all  
98 samples were coassembled using Megahit [12] software with a k-mer size of 31 and “meta-  
99 large” setting (see Supplementary Table 6 for additional summary statistics). EukRep  
100 [13] was used to remove any eukaryotic DNA from the contigs prior to the formation  
101 of an Anvio (v5) [14] contig database. The contig database was generated by removing  
102 contigs under 1000 bp, and gene prediction was performed in the Anvio environment.  
103 Sequence coverage information was determined for each assembled scaffold by mapping  
104 reads from each sample to the assembled contig database using Bowtie2 [15] with default  
105 settings. The resulting SAM files were sorted and converted to BAM files using sam-  
106 tools (v0.1.19) [16]. Each BAM file was prepared for Anvio using the “anvi-init-bam”  
107 and contig database generated using “anvi-gen-contigs-database”. The contig database  
108 and BAM mapping files were further used as input for “anvi-profile”, which generated  
109 individual sample profiles for each contig over the minimum length of 2500 bp. These  
110 profiles were then combined using “anvi-merge” and summary statistics for abundance  
111 and coverage were generated with “anvi-summarise.” Automated binning was performed  
112 using CONCOCT [17]. Scaffolds were binned on the basis of GC content and differential  
113 coverage abundance patterns across all eight samples. Manual refinement was done using  
114 Anvio’s refine option (Supplementary Table 7). Kaiju [18] was used to classify taxon-  
115 omy of the assembled contigs with “anvi-import-taxonomy-for-genes” and aided in the  
116 manual refinement process. Open reading frames were predicted with Prodigal (v2.6.3)  
117 [19]. Anvio’s custom Hidden Markov models were run, along with NCBI’s COG [20] an-  
118 notation to identify protein-coding genes. PFAM [21], TIGRFAM [22], GO terms [23],  
119 KEGG enzymes and pathways [24], and Metacyc pathways [25] were predicted with Inter-  
120 proscan (v5) [26]. These annotations were then combined with the Anvio database with

121 “anvi-import-functions”.

122 Genome completeness and contamination were evaluated on the presence of a core set  
123 of genes using CheckM (v1.0.5) “lineage\_wf” (Supplementary Table 7) [27]. Only genomes  
124 that were at least 50% complete and with less than 10% contamination were further anal-  
125 ysed – meeting the MIMAG standard for medium or high-quality genomes [28]. All recov-  
126 ered genomes were used to calculate an average amino acid identity across all genomes us-  
127 ing compareM (v0.0.23, function “aai\_wf”; <https://github.com/dparks1134/CompareM>)  
128 [29]. CheckM was used again to identify contigs that were not contained in any of the  
129 300 high-quality genomes, that is those whose size ranges from 1000–2500 bp. As an  
130 attempt to “rescue” these unbinned contigs, an alternative binning algorithm MaxBin  
131 (v2.0) [30] was employed. An additional 481 genomes were recovered, but were not in-  
132 cluded in further analysis as only 21 genomes were of average completion >65% (Sup-  
133 plementary Data 1: [https://github.com/colbyga/hazen\\_metagenome\\_publication/  
blob/master/Supplemental\\_Data\\_1\\_maxbin2\\_unbinned\\_contigs\\_summary.csv](https://github.com/colbyga/hazen_metagenome_publication/blob/master/Supplemental_Data_1_maxbin2_unbinned_contigs_summary.csv)).

## 135 **Phylogenetic placement of the MAGs**

136 Phylogenetic analyses were performed using two different sets of marker genes from the  
137 Genome Taxonomy Database (GTDB): one for bacteria (120 marker genes) and one for  
138 archaea (122 marker genes), as previously been used to assign taxonomy to MAGs [31].  
139 The marker genes were extracted from each genome by matching Pfam72 (v31) [21] and  
140 TIGRFAMs73 (v15.0) [22] annotations from GTDB (v86) [31]. Marker genes from each  
141 of the 300 genomes were translated using seqinr [32], selecting the genetic code that  
142 returned no in-frame stop codon. As some genomes had multiple copies of a marker  
143 gene, duplicated copies were filtered out by keeping the most complete sequence. Marker  
144 genes that were missing from some genomes were replaced by indel (gap) characters,

145 and their concatenated sequences were added those from the reference GTDB sequences.  
146 MUSCLE (v3.8.31) [33] was employed to construct the alignment in R (v 3.5.1) [34].  
147 Archaeal sequences were removed from the bacterial alignment on the basis of results  
148 from CheckM [27] and independently verified using a custom list of archaea specific marker  
149 genes. Alignments were then refined using trimAI [35] and the “-gappyout” parameter.  
150 FastTree2 [36], recompiled with double precision to resolve short branch lengths, was used  
151 to infer maximum likelihood phylogenetic trees from protein sequence alignments under  
152 the WAG + $\Gamma$  model [37, 38, 39]. The archaeal tree was rooted with Euryarchaeota and  
153 the bacterial tree was rooted with Patescibacteria using APE [40]. Trees were visualized  
154 and colored by phylum with ggtree [41].

## 155 **Community composition of the MAGs**

156 To determine the relative abundance of each genome in the eight samples, sample-specific  
157 genome abundances were normalized by sequencing depth [(reads mapped to a genome) /  
158 (total number of reads mapped)], making comparisons across samples possible. Genome  
159 abundances were generated using the CheckM “profile” function [27]. To determine the  
160 average abundance of major taxonomic groups across sites (determined by the phyloge-  
161 netic analysis described above), the abundances for genomes from the same taxonomic  
162 group were summed and visualized using phyloseq [42] (usually at the phylum level, un-  
163 less otherwise stated). These same abundance values were the basis for a community  
164 composition analysis. The *t*-SNE plots were constructed by assigning each genome to a  
165 site based on where it was most abundant using Rtsne [43].

## 166 **Metabolic potential of the MAGs**

167 To analyze functional marker genes in the metagenomes, we used a custom database of  
168 reference proteins sequences (COG, PFAM, TIGRFAM, KEGG) based on the marker  
169 genes used in other studies [44, 45] (Supplementary Data Files on GitHub). Pathways  
170 were also predicted using MinPath [46] to map all identified KEGG enzymes to the most  
171 parsimonious MetaCyc pathways [25]. As these MAGs were incomplete, some genes in  
172 pathways may be absent. MinPath presented only parsimonious pathways represented by  
173 multiple genes. As most genomes were present even at low abundances across all sites,  
174 a cut-off value of  $\leq 0.25$  (on a  $-\log_{10}$  scale) was set for a genome to be included in the  
175 functional analyses at any site, so that only the most abundant genomes for each site  
176 were considered. We aggregated marker genes and pathways by function, summarizing  
177 the results by phyla, except for Proteobacteria that was separated by class. We further  
178 grouped all taxa together at each site to test for significant differences in major nutri-  
179 ent cycling processes (carbon, nitrogen, and sulphur) among sites using a hierarchical  
180 clustering; significance was derived from the Approximately Unbiased bootstrap [47] and  
181 Fisher's exact test.

## 182 **Data availability**

183 Scripts and supplemental data files can be accessed from [https://github.com/colbyga/  
184 hazen\\_metagenome\\_publication](https://github.com/colbyga/hazen_metagenome_publication). Raw sequence reads of the shotgun metagenomic data  
185 were submitted to the sequence read archive (SRA) under accession no. SRP218124 and  
186 under Bioproject PRJNA556841. The geochemical data were submitted to the National  
187 Science Foundation's (NSF) Arctic Data Center repository under doi:10.18739/A20R9M41W.

## 188 References

- 189 1. Ruuskanen, M. O., St. Pierre, K. A., St. Louis, V. L., Aris-Brosou, S. & Poulain,  
190 A. J. Physicochemical drivers of microbial community structure in sediments of  
191 Lake Hazen, Nunavut, Canada. *Frontiers in Microbiology* **9**, 1138 (2018).
- 192 2. Pierre, K. S. *et al.* Contemporary limnology of the rapidly changing glacierized  
193 watershed of the world's largest high arctic lake. *Scientific reports* **9**, 4447 (2019).
- 194 3. Haglund, A.-L., Lantz, P., Törnblom, E. & Tranvik, L. Depth distribution of active  
195 bacteria and bacterial activity in lake sediment. *FEMS Microbiology Ecology* **46**,  
196 31–38 (2003).
- 197 4. Zhou, J., Bruns, M. A. & Tiedje, J. M. DNA recovery from soils of diverse compo-  
198 sition. *Applied and environmental microbiology* **62**, 316–322 (1996).
- 199 5. Poulain, A. J. *et al.* Microbial DNA records historical delivery of anthropogenic  
200 mercury. *The ISME journal* **9**, 2541 (2015).
- 201 6. Heiri, O., Lotter, A. F. & Lemcke, G. Loss on ignition as a method for estimating  
202 organic and carbonate content in sediments: reproducibility and comparability of  
203 results. *Journal of paleolimnology* **25**, 101–110 (2001).
- 204 7. Maechler, M., Rousseeuw, P., Struyf, A., Hubert, M. & Hornik, K. *cluster: Cluster*  
205 *Analysis Basics and Extensions* (2019). R package version 2.1.0 — For new features,  
206 see the 'Changelog' file (in the package source).
- 207 8. van der Laan, M. J. & Pollard, K. S. Hybrid clustering of gene expression data with  
208 visualization and the bootstrap. *Journal of Statistical Planning and Inference*  
209 **117**, 275–303 (2003).



- 210 9. Dinno, A. *Dunn's Test of Multiple Comparisons Using Rank Sums* (2017). R  
211 package version 1.3.5 — For new features, see the 'Changelog' file (in the package  
212 source).
- 213 10. Bolger, A. M., Lohse, M. & Usadel, B. Trimmomatic: a flexible trimmer for Illumina  
214 sequence data. *Bioinformatics* **30**, 2114–2120 (2014).
- 215 11. Andrews, S. *et al.* Fastqc: a quality control tool for high throughput sequence data  
216 (2010).
- 217 12. Li, D., Liu, C.-M., Luo, R., Sadakane, K. & Lam, T.-W. MEGAHIT: an ultra-fast  
218 single-node solution for large and complex metagenomics assembly via succinct de  
219 bruijn graph. *Bioinformatics* **31**, 1674–1676 (2015).
- 220 13. West, P. T., Probst, A. J., Grigoriev, I. V., Thomas, B. C. & Banfield, J. F.  
221 Genome-reconstruction for eukaryotes from complex natural microbial communi-  
222 ties. *Genome Res* **28**, 569–580 (2018).
- 223 14. Eren, A. M. *et al.* Anvio: an advanced analysis and visualization platform for omics  
224 data. *PeerJ* **3**, 1319 (2015).
- 225 15. Langmead, B. & Salzberg, S. L. Fast gapped-read alignment with Bowtie 2. *Nature*  
226 *Methods* **9**, 357 (2012).
- 227 16. Li, H. *et al.* The sequence alignment/map format and SAMtools. *Bioinformatics*  
228 **25**, 2078–2079 (2009).
- 229 17. Alneberg, J. *et al.* Binning metagenomic contigs by coverage and composition.  
230 *Nature methods* **11**, 1144 (2014).

- 231 18. Menzel, P., Ng, K. L. & Krogh, A. Fast and sensitive taxonomic classification for  
232 metagenomics with Kaiju. *Nature Communications* **7**, 11257 (2016).
- 233 19. Hyatt, D. *et al.* Prodigal: prokaryotic gene recognition and translation initiation  
234 site identification. *BMC bioinformatics* **11**, 119 (2010).
- 235 20. Tatusov, R. L. *et al.* The COG database: an updated version includes eukaryotes.  
236 *BMC bioinformatics* **4**, 41 (2003).
- 237 21. Finn, R. D. *et al.* The Pfam protein families database: towards a more sustainable  
238 future. *Nucleic acids research* **44**, D279–D285 (2015).
- 239 22. Haft, D. H., Selengut, J. D. & White, O. The TIGRFAMs database of protein  
240 families. *Nucleic acids research* **31**, 371–373 (2003).
- 241 23. Ashburner, M. *et al.* Gene ontology: tool for the unification of biology. *Nature*  
242 *genetics* **25**, 25 (2000).
- 243 24. Kanehisa, M., Sato, Y., Kawashima, M., Furumichi, M. & Tanabe, M. KEGG as  
244 a reference resource for gene and protein annotation. *Nucleic acids research* **44**,  
245 D457–D462 (2015).
- 246 25. Caspi, R. *et al.* The MetaCyc database of metabolic pathways and enzymes and  
247 the BioCyc collection of pathway/genome databases. *Nucleic acids research* **36**,  
248 D623–D631 (2007).
- 249 26. Jones, P. *et al.* InterProScan 5: genome-scale protein function classification. *Bioin-*  
250 *formatics* **30**, 1236–1240 (2014).

- 251 27. Parks, D. H., Imelfort, M., Skennerton, C. T., Hugenholtz, P. & Tyson, G. W.  
252 CheckM: assessing the quality of microbial genomes recovered from isolates, single  
253 cells, and metagenomes. *Genome research* **25**, 1043–1055 (2015).
- 254 28. Bowers, R. M. *et al.* Minimum information about a single amplified genome  
255 (MISAG) and a metagenome-assembled genome (MIMAG) of bacteria and archaea.  
256 *Nature biotechnology* **35**, 725 (2017).
- 257 29. Parks, D. H. *et al.* Recovery of nearly 8,000 metagenome-assembled genomes sub-  
258 stantially expands the tree of life. *Nature microbiology* **2**, 1533 (2017).
- 259 30. Wu, Y.-W., Simmons, B. A. & Singer, S. W. MaxBin 2.0: an automated binning  
260 algorithm to recover genomes from multiple metagenomic datasets. *Bioinformatics*  
261 **32**, 605–607 (2015).
- 262 31. Parks, D. H. *et al.* A standardized bacterial taxonomy based on genome phylogeny  
263 substantially revises the tree of life. *Nature biotechnology* **36**, 996–1004 (2018).
- 264 32. Charif, D. & Lobry, J. SeqinR 1.0.2: a contributed package to the R project for  
265 statistical computing devoted to biological sequences retrieval and analysis. In  
266 Bastolla, U., Porto, M., Roman, H. & Vendruscolo, M. (eds.) *Structural approaches*  
267 *to sequence evolution: Molecules, networks, populations*, Biological and Medical  
268 Physics, Biomedical Engineering, 207–232 (Springer Verlag, New York, 2007). ISBN  
269 : 978-3-540-35305-8.
- 270 33. Edgar, R. C. MUSCLE: multiple sequence alignment with high accuracy and high  
271 throughput. *Nucleic acids research* **32**, 1792–1797 (2004).

- 272 34. R Development Core Team. *R: A Language and Environment for Statistical Com-*  
273 *puting*. R Foundation for Statistical Computing, Vienna, Austria (2008). Available  
274 at <http://www.R-project.org>. ISBN 3-900051-07-0.
- 275 35. Capella-Gutiérrez, S., Silla-Martínez, J. M. & Gabaldón, T. trimAl: a tool for  
276 automated alignment trimming in large-scale phylogenetic analyses. *Bioinformatics*  
277 **25**, 1972–1973 (2009).
- 278 36. Price, M. N., Dehal, P. S. & Arkin, A. P. FastTree 2: approximately maximum-  
279 likelihood trees for large alignments. *PLoS one* **5**, e9490 (2010).
- 280 37. Whelan, S. & Goldman, N. A general empirical model of protein evolution derived  
281 from multiple protein families using a maximum-likelihood approach. *Molecular*  
282 *biology and evolution* **18**, 691–699 (2001).
- 283 38. Aris-Brosou, S. & Rodrigue, N. The essentials of computational molecular evolu-  
284 tion. In *Evolutionary Genomics*, 111–152 (Springer, 2012).
- 285 39. Aris-Brosou, S. & Rodrigue, N. A not-so-long introduction to computational molec-  
286 ular evolution. *Methods Mol Biol* **1910**, 71–117 (2019).
- 287 40. Paradis, E., Claude, J. & Strimmer, K. APE: analyses of phylogenetics and evolu-  
288 tion in R language. *Bioinformatics* **20**, 289–290 (2004).
- 289 41. Yu, G., Smith, D. K., Zhu, H., Guan, Y. & Lam, T. T.-Y. ggtree: an R package for  
290 visualization and annotation of phylogenetic trees with their covariates and other  
291 associated data. *Methods in Ecology and Evolution* **8**, 28–36 (2017).
- 292 42. McMurdie, P. J. & Holmes, S. phyloseq: an R package for reproducible interactive  
293 analysis and graphics of microbiome census data. *PLoS one* **8**, e61217 (2013).

- 294 43. Krijthe, J., van der Maaten, L. & Krijthe, M. J. Package ‘Rtsne’ (2018).
- 295 44. Anantharaman, K. *et al.* Thousands of microbial genomes shed light on intercon-  
296 nected biogeochemical processes in an aquifer system. *Nature Communications* **7**,  
297 13219 (2016).
- 298 45. Dombrowski, N., Teske, A. P. & Baker, B. J. Expansive microbial metabolic versa-  
299 tility and biodiversity in dynamic Guaymas Basin hydrothermal sediments. *Nature*  
300 *Communications* **9**, 4999 (2018).
- 301 46. Ye, Y. & Doak, T. A parsimony approach to biological pathway reconstruc-  
302 tion/inference for genomes and metagenomes. *PLoS Computational Biology* **5**,  
303 e1000465 (2009).
- 304 47. Suzuki, R. & Shimodaira, H. Pvcust: an R package for assessing the uncertainty  
305 in hierarchical clustering. *Bioinformatics* **22**, 1540–1542 (2006).

## Supplementary Text

### Nutrient cycles affected when transitioning from low to high

Overall, markers of carbon and sulphur metabolism significantly decreased when transitioning from the L to H sites, even if nitrogen metabolism was not (Tab. S8). Most carbon pathways, such as carbon fixation through the Calvin-Benson-Bassham (CBB) pathway, as well as the capacity for simple carbon metabolism, were shared across all runoff regimes. In contrast, carbon oxidation and reduction reactions regulated through Wood-Ljungdahl pathway were only observed in the H sites, where sedimentary conditions were anoxic throughout the first 5 cm (Figs. S4, S9). Here, Spirochaetota were likely performing anaerobic respiration and carbon fixation producing acetate as an end product. Methanogenesis pathways were present across all sites, but notably, methane oxidation pathways were absent from high runoff sites, where oxygen is limited.

Greater concentrations of ammonia in the high runoff regimes may suggest that N-containing organic matter was mineralised through ammonification (Fig. S8). In the high runoff regime, there was both an absence of nitrification and a greater presence of markers for ammonia assimilation. Markers for dissimilarity nitrate reduction (DNRA) were present in multiple genomes across all runoff regimes (Fig. S8). In contrast, urease markers were found more abundantly in low runoff regimes, where ammonia concentration was lower (Fig. S5). The functional ability of microbes to cycle sulphur between oxidised and reduced forms was significantly different between the high and low runoff regimes (Tab. S8). In the high runoff regime, Gammaproteobacteria were the only organisms with the metabolic capacity to expansively utilise sulphur, performing sulphide oxidation and thiosulphate reduction. Whereas, sulphate reduction was predominantly found in the soil, control, and low runoff regimes.

Aside from nutrient cycling, we also assessed the capacity of microbial communities to process metals and antibiotics. Metal resistance and cycling was mostly ubiquitous throughout all of the sites, regardless of runoff. Methyl mercury production, identified by the presence of both *hgcA* and *hgcB* genes [1], was only implicated in the high runoff sites, in Spirocheatoa and Chloroflexoata. However, genes conferring mercury resistance involved in the conversion of inorganic  $Hg^{II}$  to the less toxic  $Hg^0$  – were evenly distributed throughout the sites. There was a broad presence of metal tolerance that was indicated by genetic determinants related to heavy metal resistance of cadmium, cobalt, copper, lead and zinc (Fig. S9). Furthermore, antimicrobial resistance genes specifically  $\beta$ -lactamases, were ubiquitous across all genomes at all sites. We identified 90 genomes with antibiotic resistance genes (Fig. S??). Drug resistance was prevalent throughout all phyla, including one Creanarchaeota (archaeal) genome (Figs. S9, S??). Finally, we found that while amino acids were readily synthesised and degraded by most organisms (Fig. S9), the degradation of polycyclic aromatic compounds appeared to be least prevalent in the high runoff sites.

## Sites clustered by runoff regime

To identify potential drivers of this reduction in diversity when going from the L to the H transects, we bi-clustered genomes by their normalised abundances (on a -log<sub>10</sub> scale to reduce skew) and by sample site (Fig. S12), and found that sites clustered following a similar pattern to geochemical features (see Fig. 1B), with H sites grouping separately from L sites (Fig. 3A). The normalised abundances of MAGs showed no strong phylogeographic pattern, in that we did not observe an assemblage of MAGs solely representative of a given site (Fig. S13). In spite of this absence of phylogeographic pattern, the tanglegram suggests that the beta diversity of highly abundant MAGs in the L/C sites was greater than at the H sites (see the distribution of green lines connecting the phylogenetic and clustered trees in Tab. S13). This difference in diversity between samples is further supported by an NDMS ordination (Fig. S14) and a PERMANOVA test on a PCoA ordination (Fig. S14).

## References

1. Parks JM, Johs A, Podar M, Bridou R, Hurt RA, Smith SD, et al. The genetic basis for bacterial mercury methylation. *Science*. 2013;339(6125):1332–1335.
2. Pierre KS, Louis VS, Lehnerr I, Schiff S, Muir D, Poulain A, et al. Contemporary limnology of the rapidly changing glacierized watershed of the world's largest High Arctic lake. *Scientific reports*. 2019;9(1):4447.

## Supplementary Figures

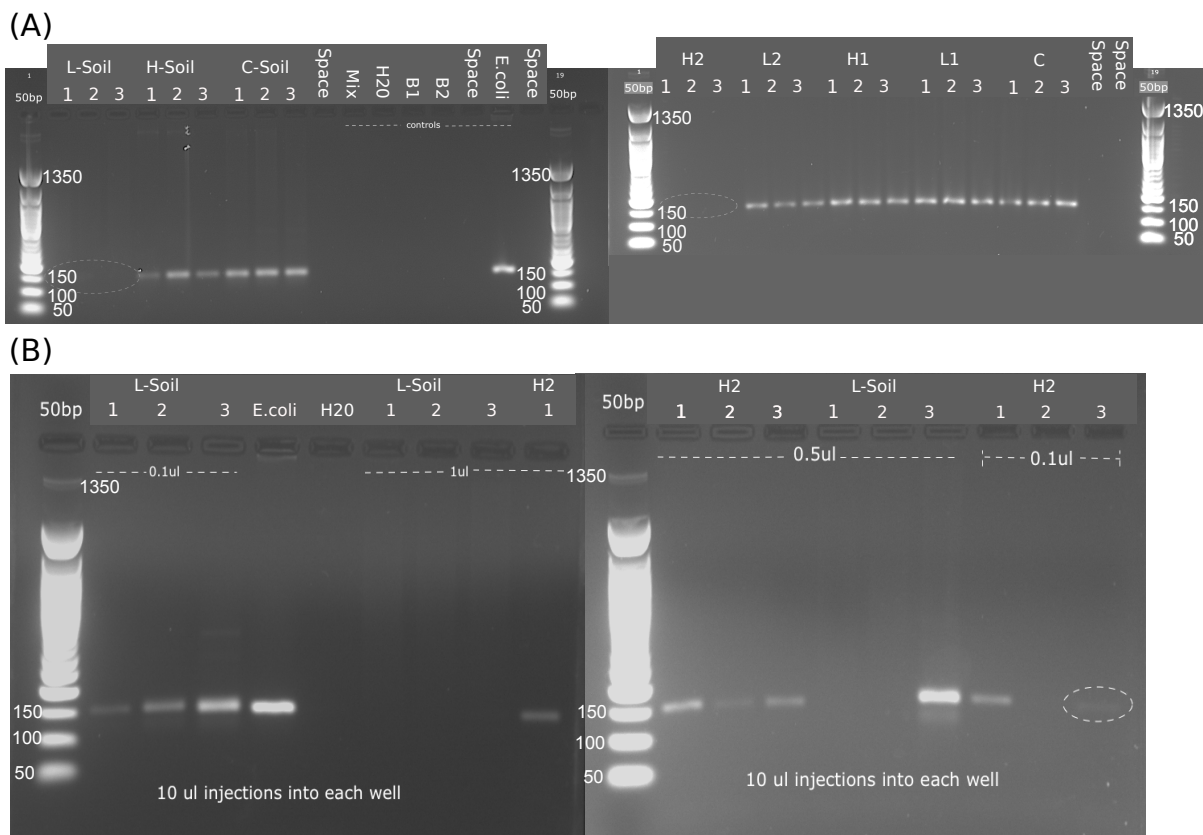

**Supplementary Figure 1.** Gel electrophoresis images of the *glnA* gene for each sample extracted in triplicate. (A) Initial gel results using  $1 \mu\text{l}$  of DNA for each PCR reaction. Every sample contains *glnA* except L-Soil and H2. (B) Repeated PCR reaction for L-Soil and H2. Diluted DNA concentrations for PCR from  $1 \mu\text{l}$  to  $0.1 \mu\text{l}$  and  $0.5 \mu\text{l}$ .



L-Soil

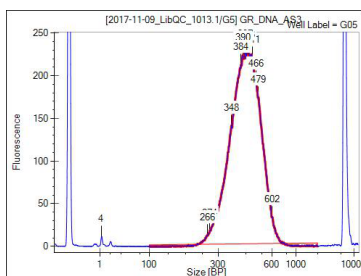

H-Soil

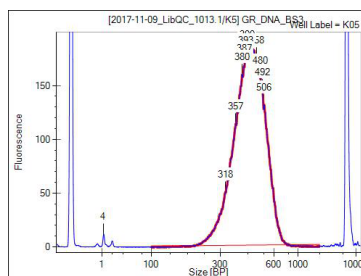

C-Soil

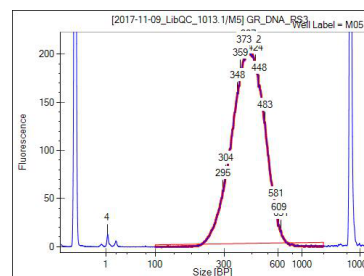

L2

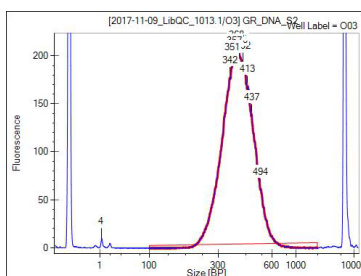

H2

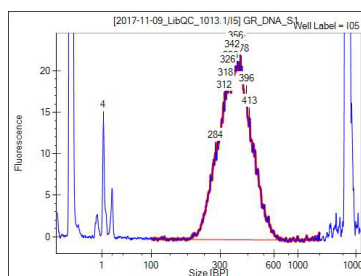

C

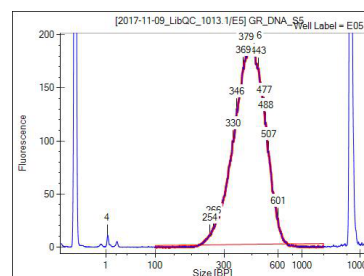

L1

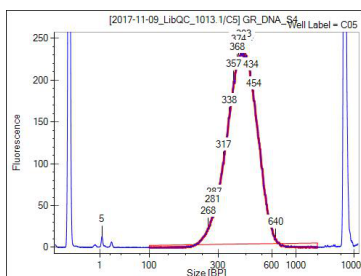

H1

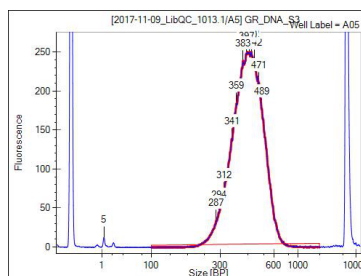

**Supplementary Figure 2.** Illumina HiSeq DNA sequencing library validation from an Agilent Technology 2100 Bioanalyzer. All libraries were constructed using Illumina TruSeq DNA PCR-Free Library Prep. The library results for each of the eight samples is presented and labelled above the panel: L-Soil, H-Soil, C-Soil, L2, H2, C, L1, H1. Peaks between 300-600 bp indicate the presence of DNA. Peaks below 1 bp and above 1000 bp are internal standards.

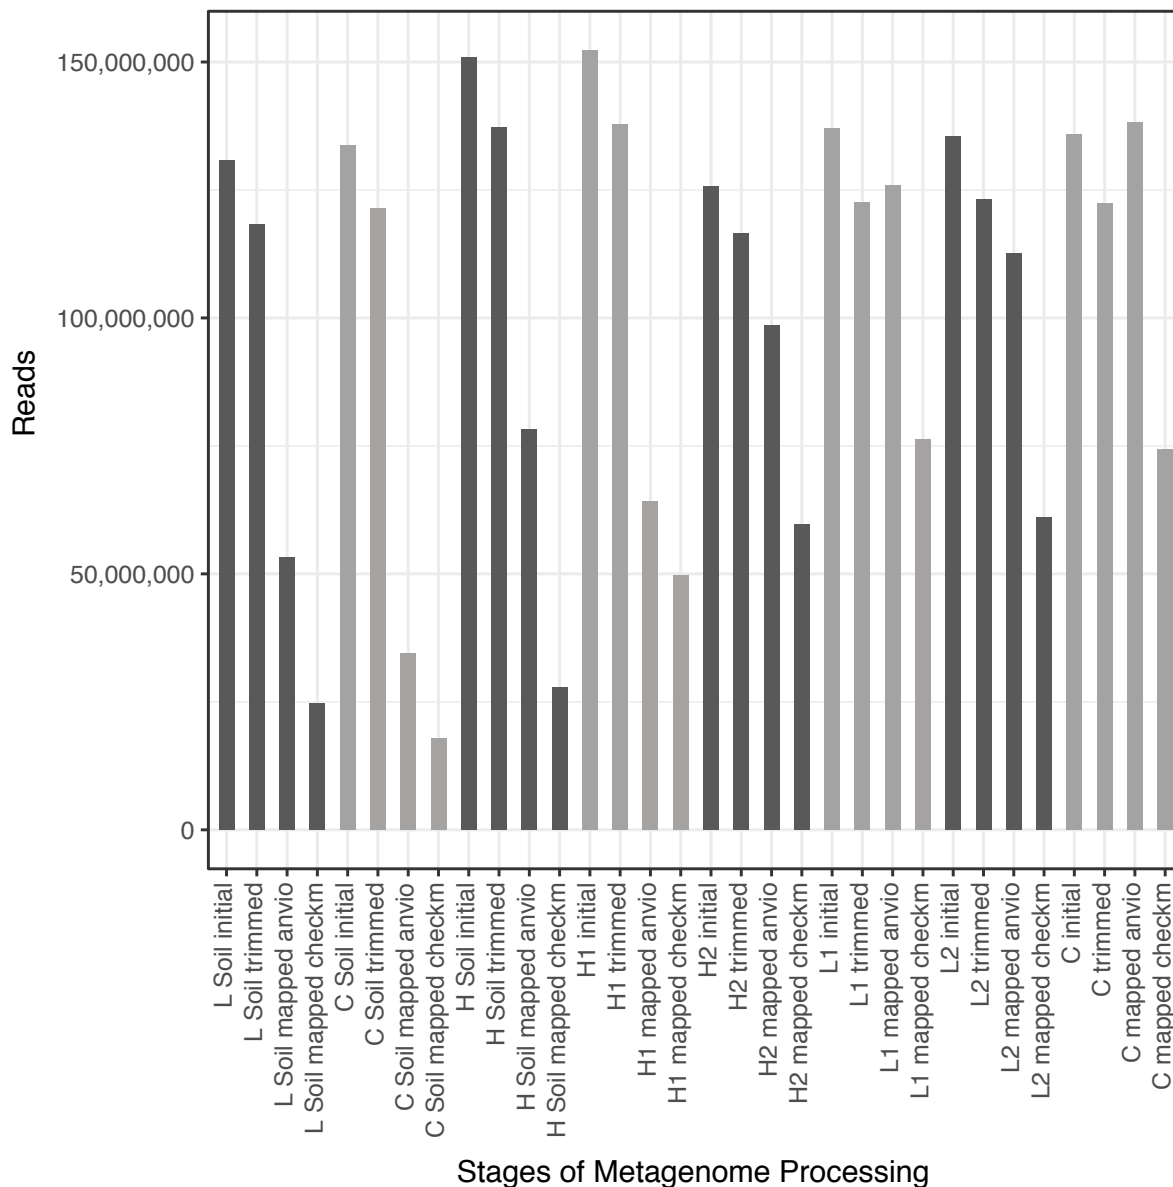

**Supplementary Figure 3.** Number of reads throughout analysis. Reads are successively decreasing, except for the reads mapped to the Anvio contig database, as each read can map to more than one contig and be counted more than once. The reads mapped using checkM include only reads that map to the 300 high quality reconstructed genomes, opposed to all reconstructed genomes in the Anvio mapping.

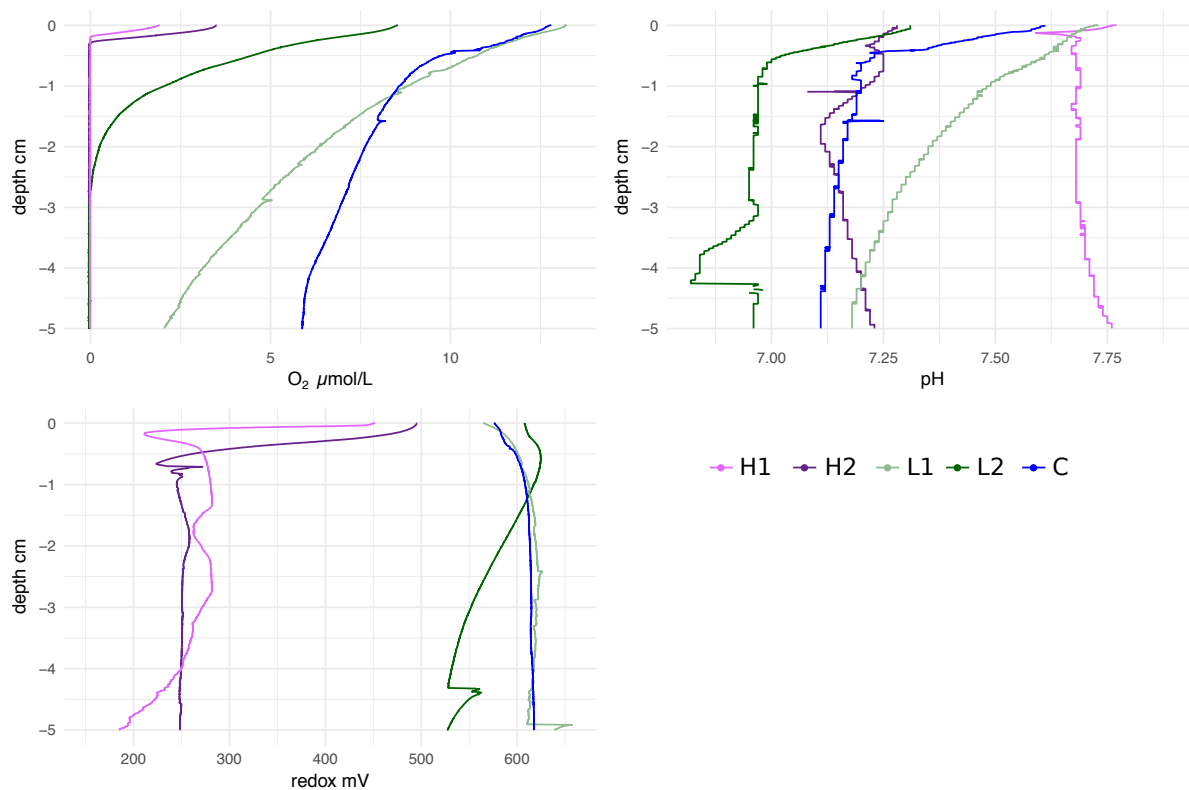

**Supplementary Figure 4.** Sediment microprobe profiles for oxygen ( $O_2$ ), pH, and redox measured in 100  $\mu\text{m}$  intervals. Legend (bottom right) indicates the colour of each sediment site in the profiles.

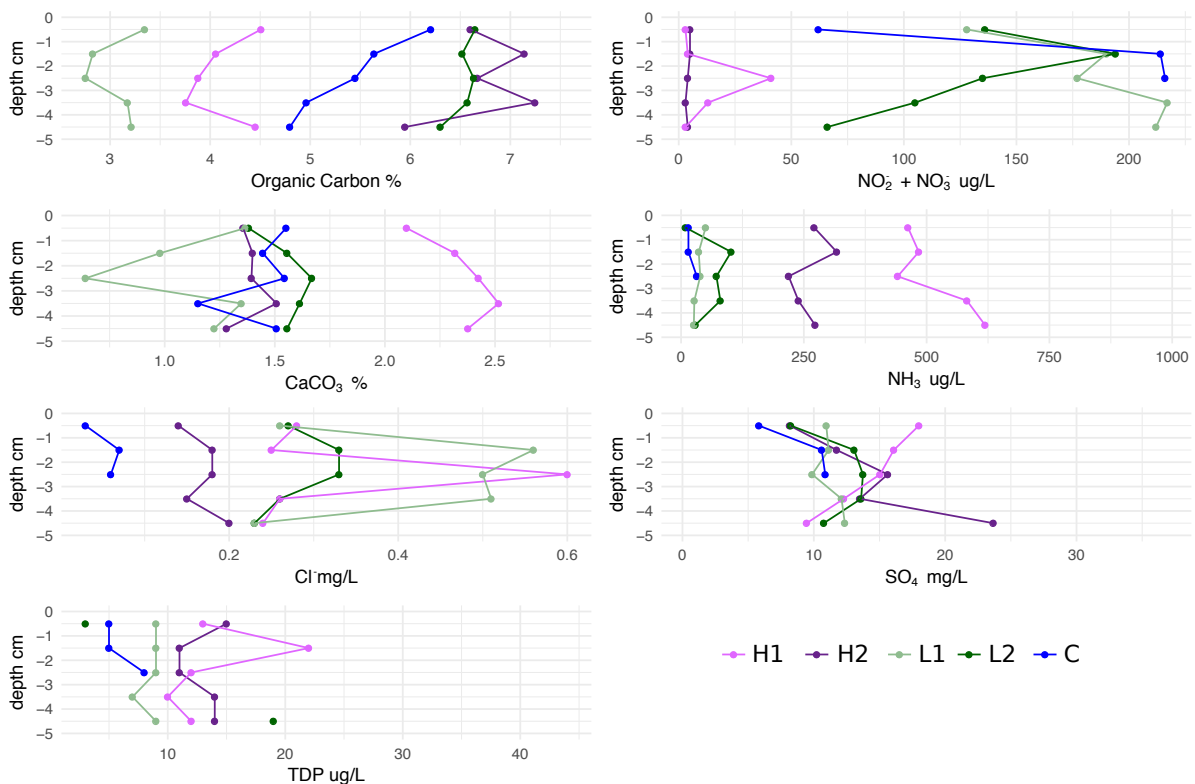

**Supplementary Figure 5.** Sediment porewater profiles for organic carbon, nitrite and nitrates, calcium carbonate, ammonia, chlorine, sulphate, and total dissolved phosphorus (TDP). TDP was removed when producing PCA and boxplots in Figure 1 because of incomplete measurements in C and L2. Legend (bottom right) indicates the colour of each sediment site in the profiles.

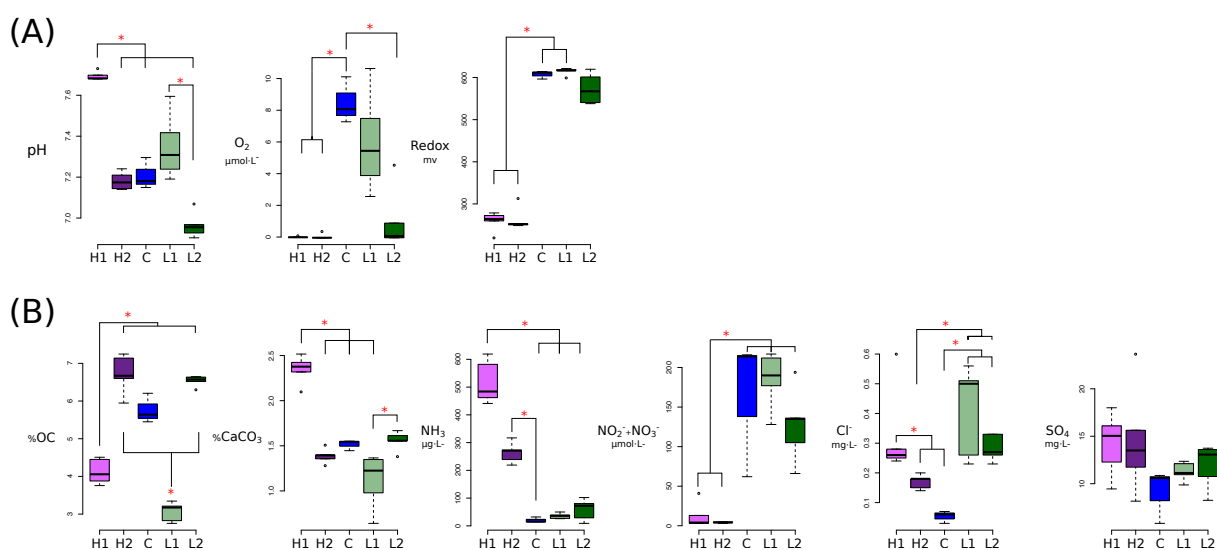

**Supplementary Figure 6.** Distribution of all chemical features for sediment sites. Includes chlorine and sulphate measurements absent from Figure 1. Branches and asterisks indicate significant differences between sites  $P < 0.025$  (Dunn Test). If branches form a dichotomy or trichotomy, the interactions within that group is not significant. (A) Microprobe measurements collected at every 100  $\mu\text{m}$ . (B) Porewater measurements collected from bulk 1 cm intervals.

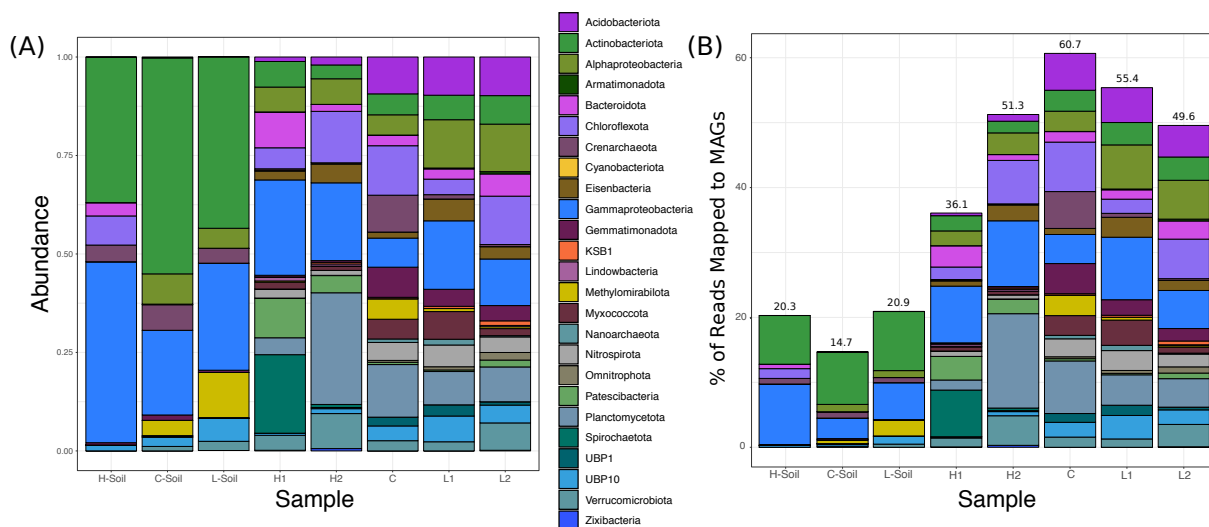

**Supplementary Figure 7.** Reconstructed genome abundance across sites. (A) Amount of reads mapped to the 300 high quality genomes for each sample normalised to 100%. Only reads that were mapped to genomes are shown and all unmapped reads have been excluded. (B) Amount of reads mapped to the 300 high quality genomes for each sample.

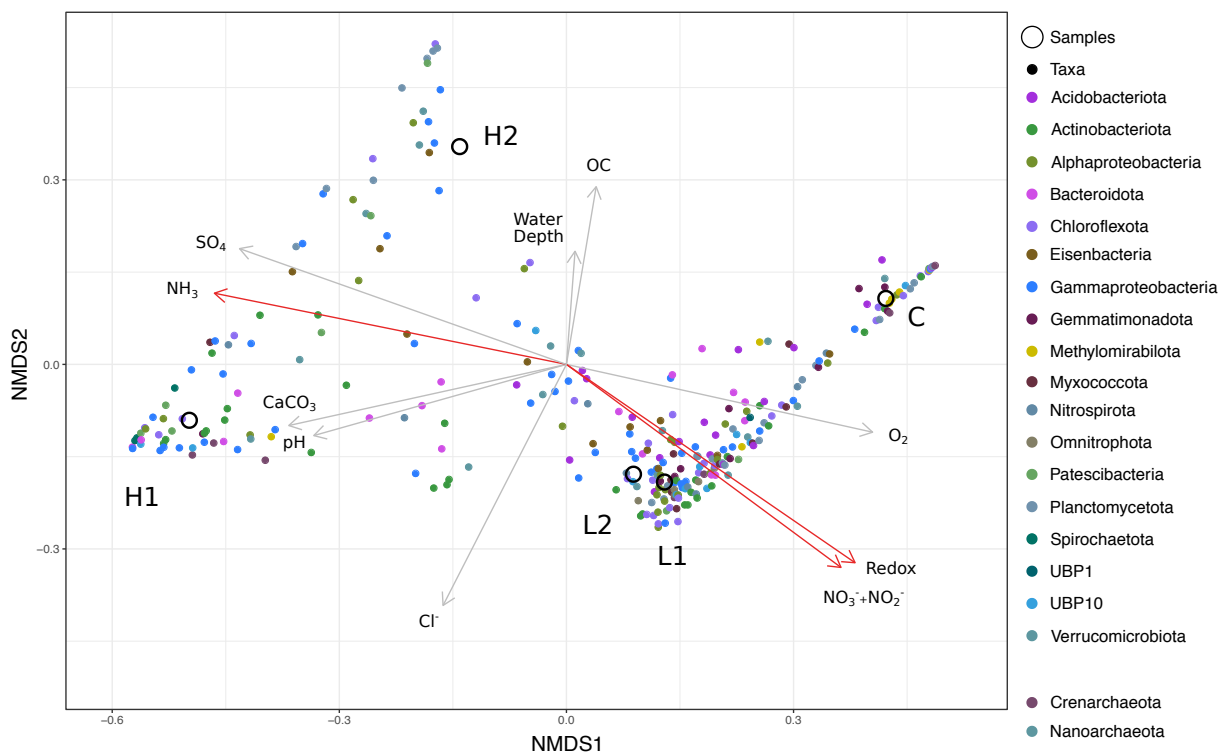

**Supplementary Figure 8.** NMDS analysis of genomes from 20 most abundant phyla in sediment sites. Physical and chemical vectors are fitted to data. Red vectors are significant (permutation test:  $P < 0.05$ ).

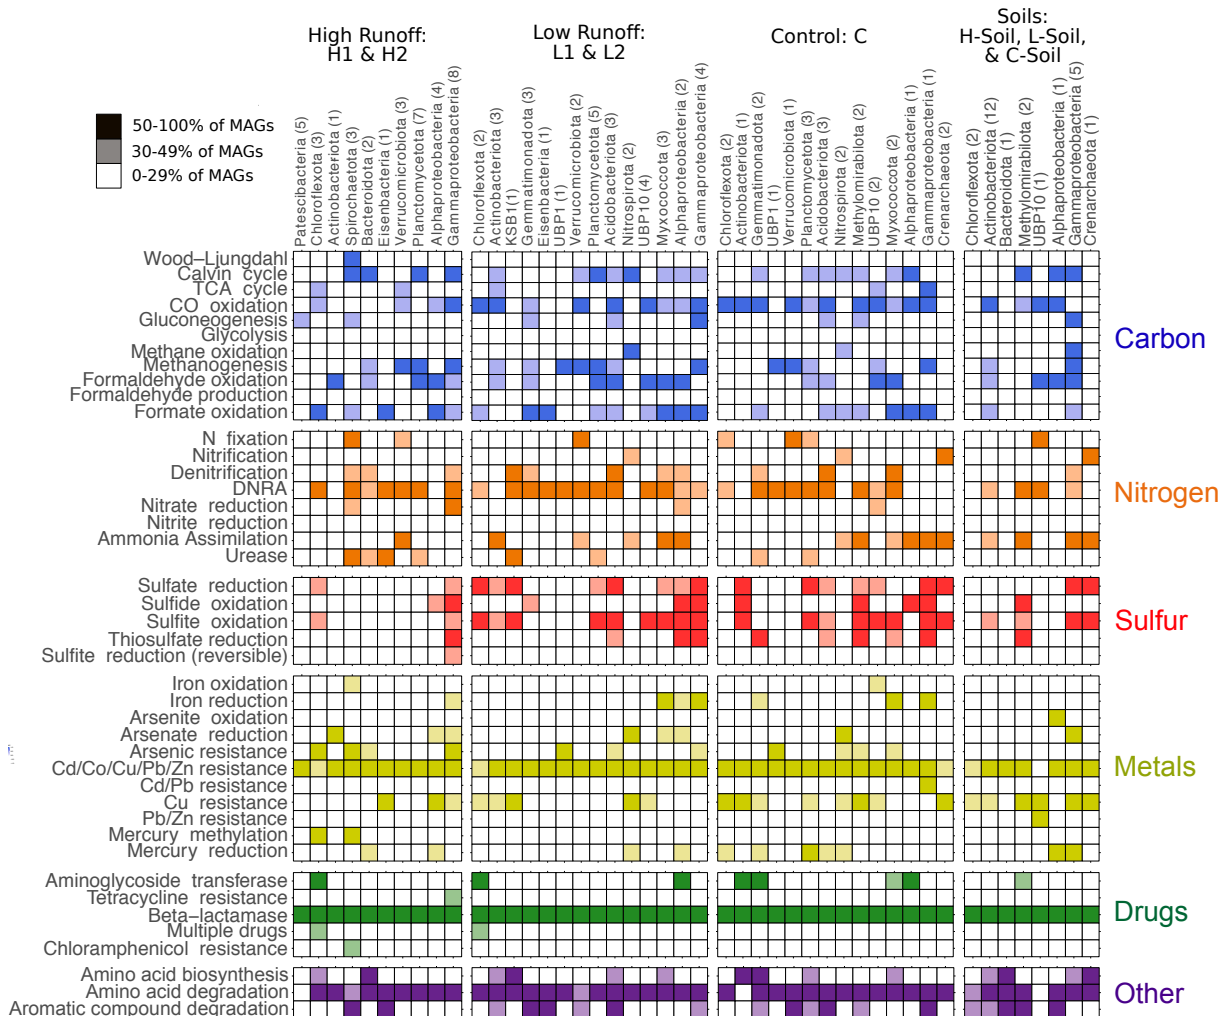

**Supplementary Figure 9.** Metabolic capacity of genomes separated by hydrological regime. Genomes are only considered to contribute to a site if 0.56% ( $-\log_{10} \leq 0.25$ ) of reads per sample mapped to a genome. Presence of core metabolic genes involved in carbon metabolism, nitrogen metabolism, sulphur metabolism, metal cycling, antibiotic resistance, and other metabolism are shown. Number of genomes for each taxa are shown in parentheses. Blank: genes predicting function are absent or in low abundance. Shaded colours: genes predicting function are present in 30-50% of genomes per phylogenetic group. Dark colours: genes predicting function are present in >50% of genomes per phylogenetic group.



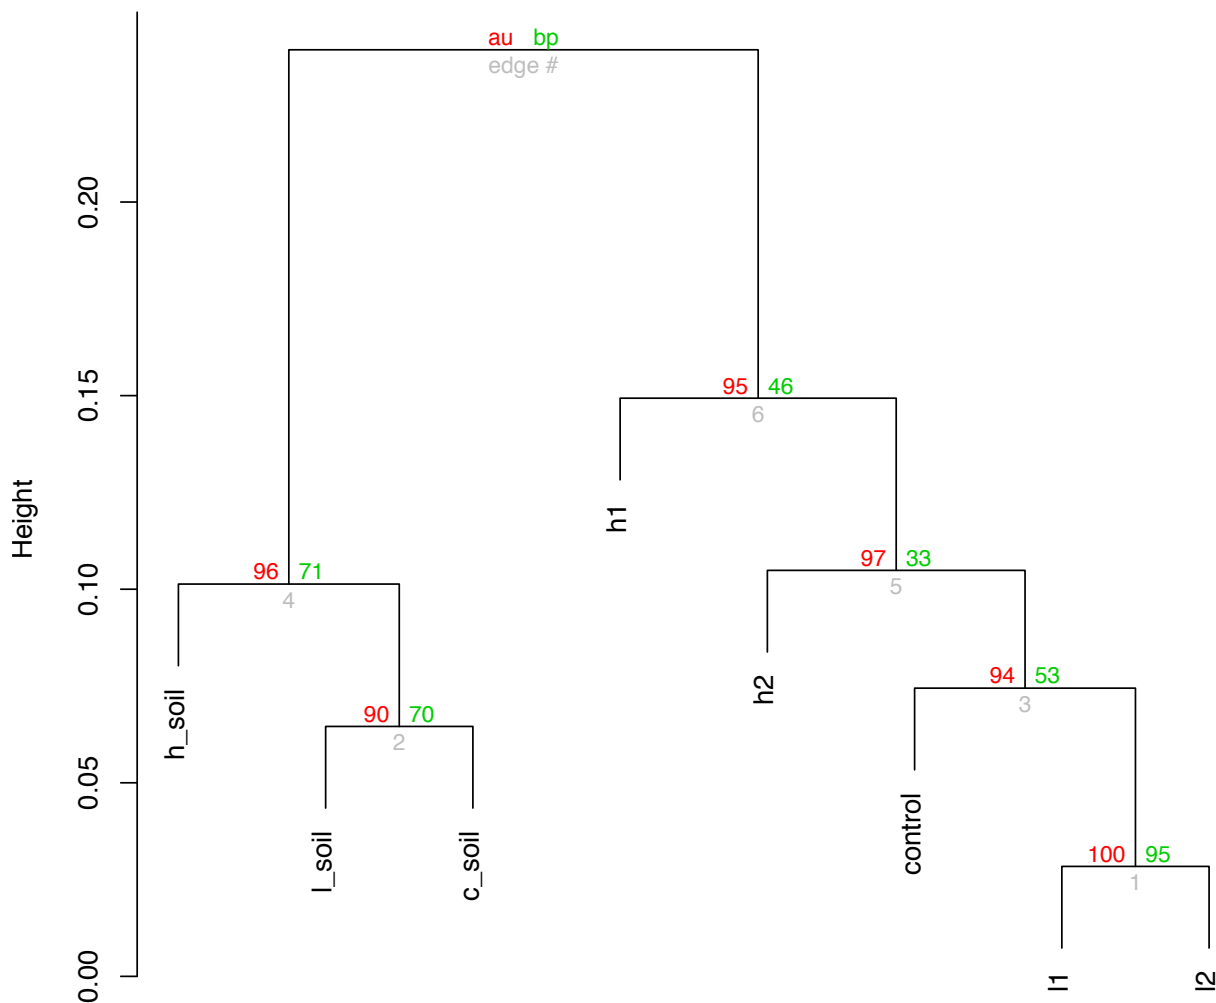

**Supplementary Figure 10.** Metabolic capacity for carbon, sulphur, and nitrogen cycles clustered with  $P$ -values via multiscale bootstrap resampling. AU (approximately unbiased)  $P$ -values are shown in red, with any value  $> 0.95$  (significance level 0.05) being significant. BP (bootstrap proportions) values are shown in green. Hierarchical clustering was completed using “correlation” as distance method and “average” as clustering method.

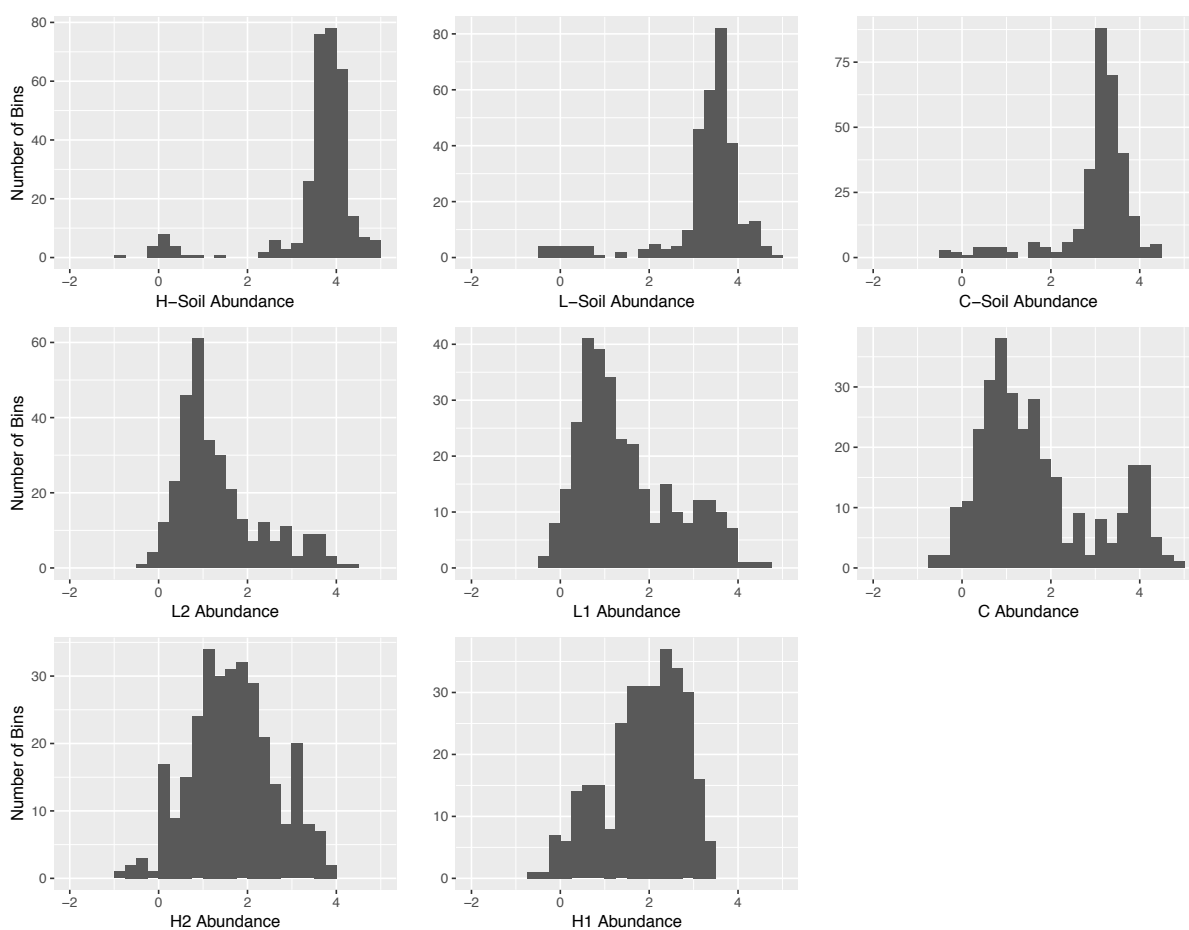

**Supplementary Figure 11.** Genome abundance per sample ( $-\log_{10}$  scale).

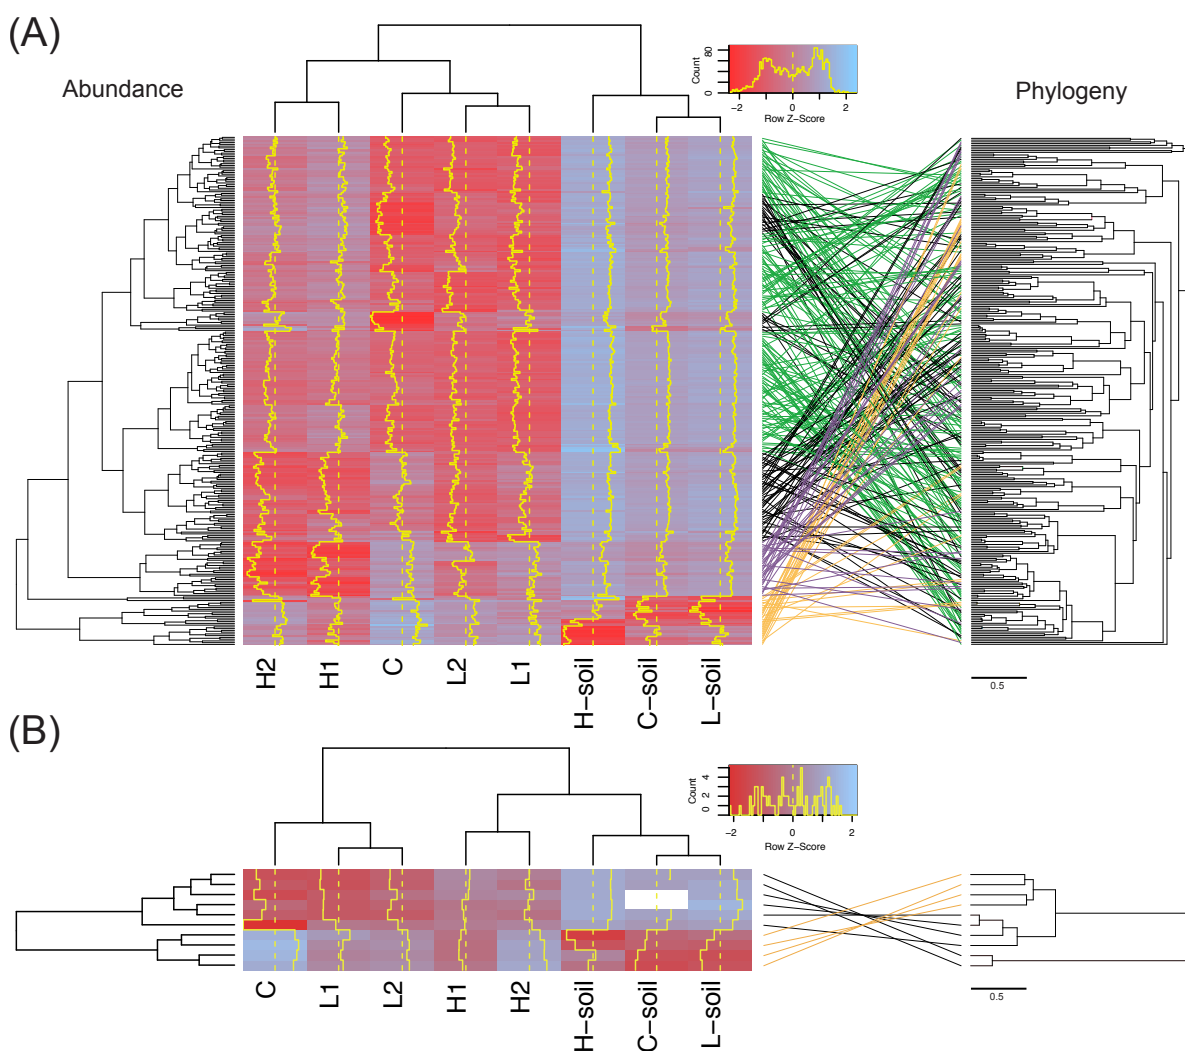

**Supplementary Figure 12.** Genome abundance heatmap, and tanglegram separated by (A) bacterial genomes and (B) archaeal genomes. Left: The heatmap displays genome abundance per site normalised by amount of reads in each sample and transformed to a  $-\log_{10}$  scale. Dotted yellow lines represent mean abundance values, and yellow traces represent the raw z-scores above (red) and below (blue) the mean. The abundance values are grouped both by sites (top dendrogram) and genomes (left dendrogram). Right: Tanglegram between dendrogram clustered by similar abundances and phylogenetic tree. Highlights in tanglegram: orange lines are genomes abundant in soil, green lines are genomes abundant in low runoff sediment, purple lines are genomes abundant in high runoff sediment, black lines are genomes shared in multiple environments.

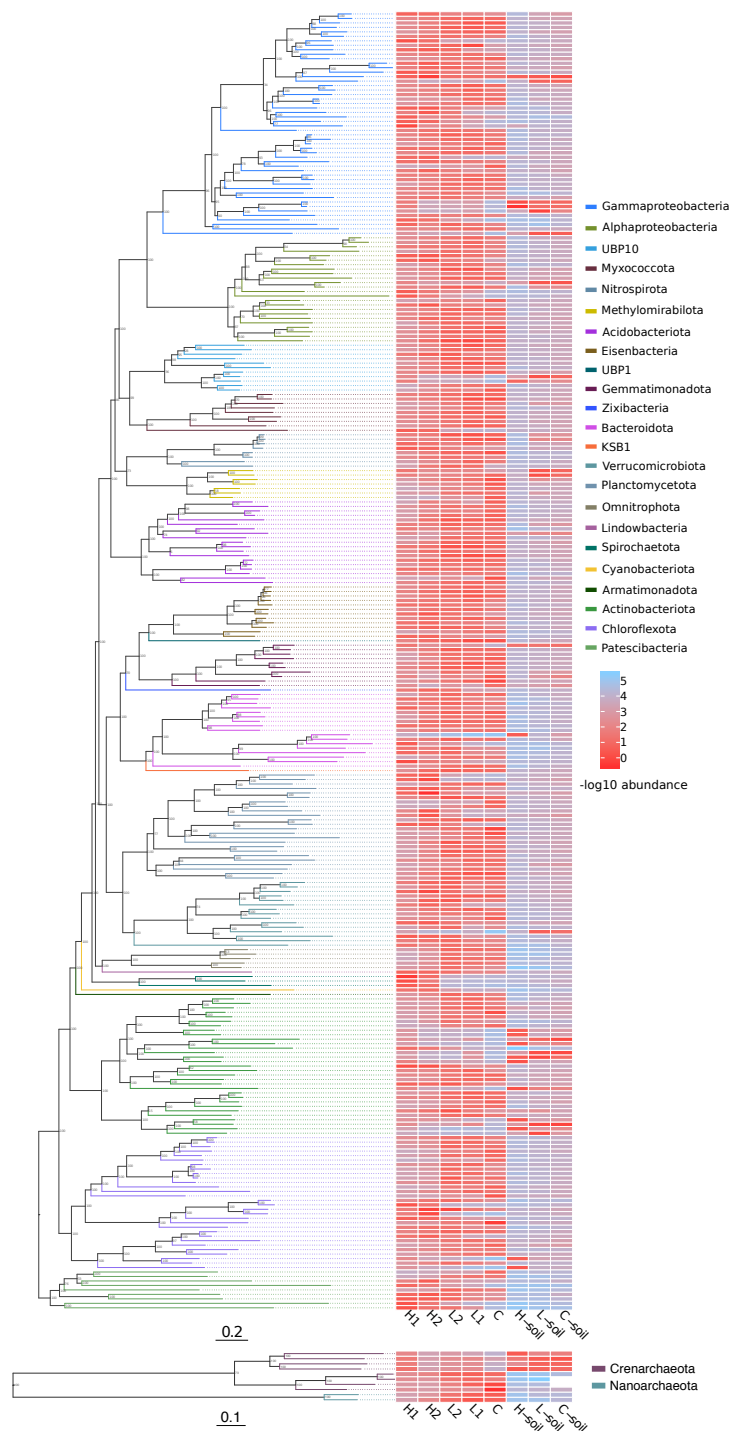

**Supplementary Figure 13.** Abundance of genomes are presented on a  $-\log_{10}$  scale where more negative values (red) are more abundant than positive values (blue). The abundance values correspond by row with the genomes phylogenetic assignment. Support values for phylogenetic tree are shown at each node.

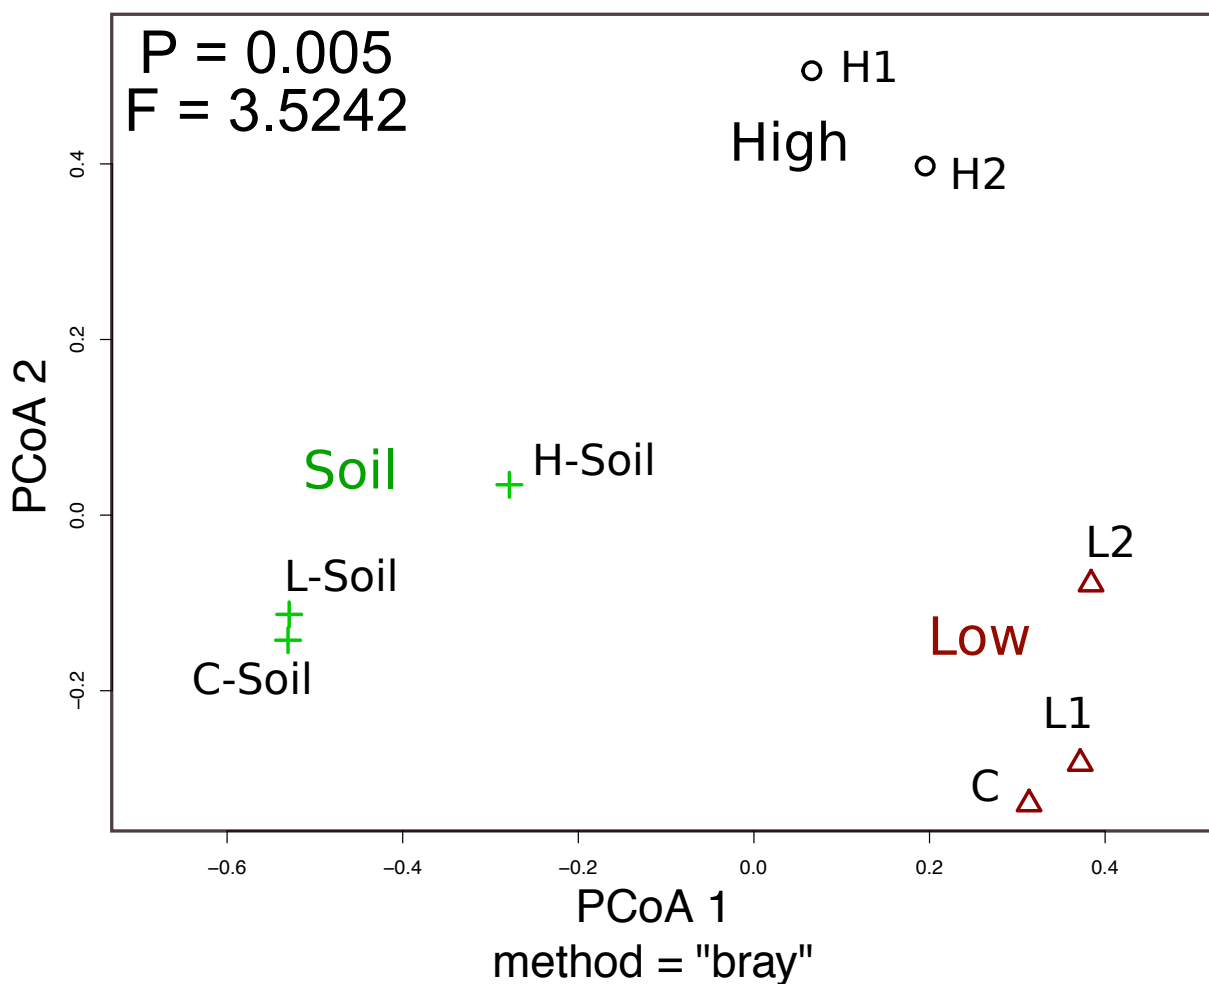

**Supplementary Figure 14.** Principal coordinate analysis (PCoA) on reconstructed genome abundances for all sites. Grouping the sites into soil, high, and low runoff was proven to be significant (PERMANOVA test:  $F = 3.52$ ,  $P = 0.005$ ).

## Supplementary Tables

**Supplementary Table 1.** Coordinates of Lake Hazen sediment and soil sites with temperature and date at time of sampling.

| Sample | Location                       | Temperature (°C) | Date         |
|--------|--------------------------------|------------------|--------------|
| H-Soil | 81° 84' 840" N; 70° 83' 849" W | -5               | June 3, 2017 |
| L-Soil | 81° 80' 332" N; 71° 54' 239" W | 0                | June 7, 2017 |
| C-Soil | 81° 79' 382" N; 70° 44' 486" W | -2               | June 3, 2017 |
| H1     | 81° 84' 150" N; 70° 85' 175" W | not measured     | May 24, 2017 |
| H2     | 81° 82' 493" N; 70° 71' 498" W | not measured     | May 29, 2017 |
| C      | 81° 80' 343" N; 70° 50' 447" W | not measured     | May 27, 2017 |
| L1     | 80° 80' 521" N; 70° 52' 699" W | not measured     | June 1, 2017 |
| L2     | 81° 79' 171" N; 71° 46' 926" W | not measured     | June 2, 2017 |

**Supplementary Table 2.** Sediment deposition dates and rates for the two deep sites, H2 and L2, is based on <sup>210</sup>Pb constant rate of supply (CRS) dating model. Analysis was completed on 0.5 cm core intervals. Data adapted from previous study [2].

| H2 (Abbe Deepsite) |          |                     |                                            | L2 (Blister Deep Site) |          |                     |                                            |
|--------------------|----------|---------------------|--------------------------------------------|------------------------|----------|---------------------|--------------------------------------------|
| Interval           | Midpoint | CRS date (CRS year) | Sedimentation rate (g/cm <sup>2</sup> /yr) | Interval               | Midpoint | CRS date (CRS year) | Sedimentation rate (g/cm <sup>2</sup> /yr) |
| 0-0.5              | 2017.1   |                     | 0.349                                      | 0-0.5                  | 2016.5   |                     | 0.0724                                     |
| 0.5-1              | 2016.6   |                     | 0.292                                      | 0.5-1                  | 2014.0   |                     | 0.0701                                     |
| 1-1.5              | 2015.9   |                     | 0.111                                      | 1-1.5                  | 2011.3   |                     | 0.1163                                     |
| 1.5-2              | 2014.1   |                     | 0.671                                      | 1.5-2                  | 2009.2   |                     | 0.1759                                     |
| 2-2.5              | 2012.7   |                     | 0.671                                      | 2-2.5                  | 2007.3   |                     | 0.1232                                     |
| 2.5-3              | 2012.7   |                     | 0.227                                      | 2.5-3                  | 2004.7   |                     | 0.0909                                     |
| 3-3.5              | 2012.0   |                     | 5.563                                      | 3-3.5                  | 2001.9   |                     | 0.0967                                     |
| 3.5-4              | 2011.3   |                     | 5.563                                      | 3.5-4                  | 1998.8   |                     | 0.0854                                     |
| 4-4.5              | 2011.3   |                     | 5.563                                      | 4-4.5                  | 1994.0   |                     | 0.0513                                     |
| 4.5-5              | 2011.3   |                     | 5.563                                      | 4.5-5                  | 1987.2   |                     | 0.0375                                     |
| 5-5.5              | 2011.3   |                     | 5.563                                      | 5-5.5                  | 1976.7   |                     | 0.0220                                     |
| 5.5-6              | 2011.3   |                     | 5.563                                      | 5.5-6                  | 1966.51  |                     | 0.0515                                     |
| 6-6.5              | 2011.3   |                     | 5.563                                      | 6-6.5                  | 1957.66  |                     | 0.0339                                     |
| 6.5-7              | 2011.3   |                     | 5.563                                      | 6.5-7                  | 1949.00  |                     | 0.0537                                     |
| 7-7.5              | 2011.3   |                     | 5.563                                      | 7-7.5                  | 1940.41  |                     | 0.0451                                     |
| 7.5-8              | 2011.3   |                     | 5.563                                      | 7.5-8                  | 1931.79  |                     | 0.0668                                     |
| 8-8.5              | 2011.3   |                     | 5.563                                      | 8-8.5                  | 1925.07  |                     | 0.0553                                     |
| 8.5-9              | 2011.3   |                     | 0.441                                      | 8.5-9                  | 1918.10  |                     | 0.0553                                     |
| 9-9.5              | 2010.9   |                     | 0.224                                      | 9-9.5                  | 1911.08  |                     | 0.0553                                     |
| 9.5-10             | 2009.8   |                     | 0.123                                      | 9.5-10                 | 1904.42  |                     | 0.0553                                     |

**Supplementary Table 3.** Glacial runoff to the Lake Hazen Watershed. Lengths of rivers in km are shown in parentheses. Mass balance modelled runoff for years 2015 and 2016. Sampling dates in 2017 were prior to the summer runoff. Data adapted from previous study [2].

| River                    | Surface area (km <sup>2</sup> ) |         |           | Runoff volume (km <sup>3</sup> ) |        |
|--------------------------|---------------------------------|---------|-----------|----------------------------------|--------|
|                          | Catchment                       | Glacier | River     | 2015                             | 2016   |
| High Runoff: Abbé (AB)   | 390                             | 204     | 7.9 (21)  | 0.061                            | 0.015  |
| Low Runoff: Blister (BR) | n/a                             | 6       | 2.5 (11)  | 0.002                            | <0.001 |
| Gilman (GL)              | 992                             | 708     | 5.1 (22)  | 0.192                            | 0.08   |
| Henrietta Nesmith (HN)   | 1274                            | 1041    | 9.6 (4.6) | 0.291                            | 0.075  |
| Snowgoose (SG)           | 222                             | 87      | 5.6 (17)  | 0.026                            | 0.006  |
| Turnabout (TN)           | 678                             | 259     | 13.4 (42) | 0.082                            | 0.024  |
| Very (VR)                | 1035                            | 269     | 32.9 (39) | 0.165                            | 0.08   |
| Watershed total          | 7516                            | 3078    | 91.2      | 0.979                            | 0.291  |

**Supplementary Table 4.** DNA extraction masses. DNA was extracted in triplicate for each sample and then combined prior to sequencing.

| Lake Hazen | Sample Location      | Tube ID | Wet Weight (g) |       |       |               | PCR with <i>glnA</i> |
|------------|----------------------|---------|----------------|-------|-------|---------------|----------------------|
|            |                      |         | 1              | 2     | 3     | Total (grams) |                      |
| Sediment   | H2: Deephole         | S1      | 0.416          | 0.455 | 0.499 | 1.370         | yes (diluted)        |
|            | L2: Blister Deep     | S2      | 0.497          | 0.455 | 0.389 | 1.341         | yes                  |
|            | H1: Abbe             | S3      | 0.469          | 0.514 | 0.552 | 1.535         | yes                  |
|            | L1: Blister Shallow  | S4      | 0.429          | 0.402 | 0.361 | 1.192         | yes                  |
|            | C: Ruggles           | S5      | 0.518          | 0.447 | 0.331 | 1.296         | yes                  |
| Soil       | L-Soil: Blister Soil | BS3     | 0.527          | 0.535 | 0.561 | 1.623         | yes (diluted)        |
|            | H-Soil: Abbe Soil    | AS3     | 0.443          | 0.537 | 0.417 | 1.397         | yes                  |
|            | C-Soil: Ruggles Soil | RS3     | 0.447          | 0.500 | 0.447 | 1.394         | yes                  |

**Supplementary Table 5.** DNA fluorescence assay quantification for each sample.

Note: H2 sequencing required using full extraction volume of 65  $\mu\text{l}$  to reach an appropriate concentration.

| Sample | Volume ( $\mu\text{l}$ ) | Concentration ( $\text{ng}/\mu\text{l}$ ) | Total DNA ( $\text{ng}$ ) | NanoDrop (concentration $\text{ng}/\mu\text{l}$ ) |
|--------|--------------------------|-------------------------------------------|---------------------------|---------------------------------------------------|
| H2     | 65                       | 0.08                                      | 3.36                      | 4.6                                               |
| L2     | 42                       | 2.55                                      | 107.1                     | 7.6                                               |
| H1     | 42                       | 4.33                                      | 181.86                    | 10.2                                              |
| L2     | 42                       | 17.98                                     | 755.16                    | 32.8                                              |
| C      | 42                       | 21.2                                      | 890.4                     | 36.4                                              |
| H-Soil | 42                       | 38.14                                     | 1601.88                   | 65.2                                              |
| L-Soil | 47                       | 69.88                                     | 3284.36                   | 149.0                                             |
| C-Soil | 47                       | 74.38                                     | 3495.86                   | 110.0                                             |

**Supplementary Table 6.** Contigs were assembled with Megahit and used in Anvio database. Only contigs that were greater than 2500 bp in length were used to form MAGs, however, contigs with a length of 1000 bp or more were used to form the initial database.

|         | Contigs  | Total Length (bp) | Min Contig Length (bp) | Max Contig Length (bp) | Avg Contig Length (bp) | N50 (bp) | # of genes prodigal |
|---------|----------|-------------------|------------------------|------------------------|------------------------|----------|---------------------|
| Megahit | 12026467 | 8477069127        | 200                    | 792468                 | 705                    | 756      | NA                  |
| Anvio   | 1455655  | 3414974759        | 1000                   | 792468                 | NA                     | 285024   | 4254625             |

**Supplementary Table 7.** Number of bins recovered at each assembly step prior to and after manual refinement with Anvio.

|                            | Anvio-Output (CONCOCT binning) | CheckM | Anvio-Output (manually refined) | Final CheckM |
|----------------------------|--------------------------------|--------|---------------------------------|--------------|
| Total Bins                 | 850                            | 850    | 877                             | 877          |
| Completion, Redundancy     |                                |        |                                 |              |
| C: >90, R: <10             | 52                             | 74     | 52                              | 72           |
| C: >70, R: <10             | 180                            | 199    | 178                             | 198          |
| C: >50, R: <10             | 321                            | 324    | 309                             | 300          |
| C: <50, R: any             | 529                            | 526    | 568                             | 577          |
| Contamination              |                                |        |                                 |              |
| <1                         | 233                            | 261    | 255                             | 286          |
| <5                         | 544                            | 632    | 590                             | 676          |
| >10                        | 8                              | 51     | 7                               | 27           |
| Good bins but contaminated |                                |        |                                 |              |
| C: >50, R: >10             | 2                              | 27     | 0                               | 2            |
| C: >70, R: >10             | 1                              | 6      | 0                               | 0            |
| C: >90, R: >10             | 0                              | 2      | 0                               | 0            |



**Supplementary Table 8.** *P*-values for marker gene and pathway distribution between sites. A Fisher's exact test was used in the place of  $\chi^2$  test for small count numbers. *P*-values of less than 0.05 are considered significant (labelled with an asterisks).

| Functional Marker | High vs Low | High vs Control | High vs Soil | Low vs Control | Low vs Soil | Control vs Soil |
|-------------------|-------------|-----------------|--------------|----------------|-------------|-----------------|
| Carbon Cycle      | 0.03298 *   | 0.0004998 *     | 0.0004998 *  | 0.07746        | 0.1384      | 0.001499 *      |
| Nitrogen Cycle    | 0.07596     | 0.001999 *      | 0.0004998 *  | 0.7006         | 0.03448 *   | 0.1859          |
| sulphur Cycle     | 0.001999 *  | 0.002999 *      | 0.0004998 *  | 0.4913         | 0.02999 *   | 0.3823          |
